1 **Title:** *Salmonella* Enhances Osteogenic Differentiation in Adipose-Derived Mesenchymal Stem  
2 Cells

3 **Running header:** *Salmonella* alters MSC differentiation trajectory

4 **Authors:** Soraya H. Foutouhi<sup>1,2#</sup>, Nuradilla Mohamad-Fauzi<sup>3##\*</sup>, Dylan Bobby Storey<sup>1†</sup>, Azarene  
5 A. Foutouhi<sup>1</sup>, Nguyet Kong<sup>1,2</sup>, Amir Kol<sup>4</sup>, Dori Borjesson<sup>4</sup>, Prerak Desai<sup>1‡</sup>, Jigna Shah<sup>1‡</sup>, James  
6 D. Murray<sup>1,3\*</sup>, and Bart C. Weimer<sup>1,2\*</sup>

7 <sup>1</sup>*Department of Population Health and Reproduction,*

8 <sup>2</sup>*100K Pathogen Genome Project*

9 <sup>3</sup>*Department of Animal Science,*

10 <sup>4</sup>*Department of Pathology, Microbiology and Immunology,*

11 *University of California, Davis, CA, USA. 95616*

12 #co-first authors. Both contributed equally to this work.

13 **Current Addresses:** \*University of Malaya, Institute of Ocean and Earth Sciences, Kuala  
14 Lumpur, Malaysia; †West Sacramento, CA; ‡Janssen, Inc., Spring House, PN

15 **\*Corresponding Authors:** Correspondence and requests for materials should be addressed to  
16 JDM ([jdmurray@ucdavis.edu](mailto:jdmurray@ucdavis.edu)) and BCW ([bcweimer@ucdavis.edu](mailto:bcweimer@ucdavis.edu)).

17 **Author contributions:**

18 SHF: Conception and design, Collection and/or assembly of data, Data analysis and interpretation, Manuscript  
19 writing; NMF: Conception and design, Collection and/or assembly of data, Data analysis and interpretation,  
20 Manuscript writing; DS: Informatics, Data analysis and interpretation; PD: Collection and/or assembly of data;  
21 JD: Collection and/or assembly of data; AAF: Administrative support, Collection and/or assembly of data; NK:  
22 Administrative support, Collection and/or assembly of data; AK: Collection and/or assembly of data, Data analysis  
23 and interpretation; DB: Study design, Provision of study material; JDM: Experiment conception and design,  
24 Financial support, Administrative support, Provision of study material, Data analysis and interpretation, Manuscript  
25 writing, Final approval of manuscript.; BCW: Experiment conception and design, Financial support,  
26 Administrative support, Provision of study material, Data analysis and interpretation, Manuscript writing, Final  
27 approval of manuscript.  
28

## 29 **Abstract**

30           The potential of mesenchymal stem cells (MSCs) for tissue repair and regeneration has  
31 garnered great attention. While MSC interaction with microbes at sites of tissue damage and  
32 inflammation is likely, especially in the gut, the consequences of bacterial association have yet to  
33 be elucidated. This study investigated the effect of *Salmonella enterica* ssp *enterica* serotype  
34 Typhimurium on MSC trilineage differentiation path and mechanism. Through examination of  
35 key markers of differentiation, immunomodulatory regulators, and inflammatory cytokines, we  
36 demonstrated that *Salmonella* altered osteogenic and chondrogenic differentiation pathways in  
37 human and goat adipose-derived MSCs. Gene expression profiles defined signaling pathway  
38 alterations in response to *Salmonella* association not observed in epithelial cells. We uncovered  
39 significant differential expression ( $P < 0.05$ ) of genes associated with anti-apoptotic and pro-  
40 proliferative responses in MSCs during *Salmonella* challenge. These observations led us to  
41 conclude that bacteria, specifically *Salmonella*, induce pathways that influence functional  
42 differentiation trajectories in MSCs, thus implicating substantial microbial influence on MSC  
43 physiology and immune activity.

## 44 **Introduction**

45 Application of mesenchymal stem cells (MSCs) to regenerative medicine is an area of intensive  
46 research [1, 2]. In addition to a capacity for self-renewal and differentiation into cartilage, bone,  
47 and adipose tissue [3], MSCs home to sites of inflammation where they exhibit  
48 immunomodulatory functions via secretion of paracrine factors [4, 5]. In cooperation with  
49 recruited immune cells, MSCs moderate inflammation via expression of anti-inflammatory  
50 cytokines [6-8], inhibit T-lymphocyte activation, and alter macrophages to express a regulatory  
51 anti-inflammatory phenotype to increase phagocytic activity [5, 9]. Bacterial infections promote

52 inflammation and prompts MSCs to secrete anti-microbial peptides [10].

53       Microbial access to MSCs is likely at mucus membranes where tissue turnover is high and  
54 immune-responsive cells infiltrate to control pathogens [11]. Inflammation, and subsequent  
55 destruction of intestinal epithelial cells induces MSC recruitment to facilitate tissue recovery  
56 [12]. While an apoptotic epithelial cell response to infection is well characterized [13], little is  
57 known about the consequences of bacterial association on the behavior of stem cells. Treatment  
58 of MSC with lipopolysaccharide (LPS) and *Escherichia coli* increases osteogenesis and  
59 decreases adipogenesis; conversely, stimulation with *Staphylococcus aureus* decreases  
60 osteogenesis and adipogenesis [14]. Recent discovery of invasion in MSCs by numerous bacteria  
61 common in the oral cavity and gut resulted in augmentation of MSC inhibition of T-cell  
62 proliferation and provides evidence of direct alteration of MSC immune function [15].  
63 Maintenance of viability [15] and change in differentiation path [14] confirms that bacterial  
64 association with MSCs not only varies in comparison to epithelial cells, but also altered function  
65 beyond acute infection.

66       Host detection of microbial presence is accomplished in part by Toll-like receptors (TLRs),  
67 which recognize bacterial components on their cell surface in epithelial cells are also expressed  
68 in MSCs [16, 17]. It is not clear how pathogens regulate these molecules in MSCs. Tomchuck et  
69 al. [18] reported the promotion of MSC migratory abilities, whereas a study by Pevsner-Fischer  
70 [19] found TLR activation shifts lineage commitment to proliferation.

71       *Salmonella* pathogenesis in epithelial cells is primarily mediated via the type three-secretion  
72 system [20, 21], which injects effector proteins that lead to apoptosis. These proteins target a  
73 variety of host cell regulators, including the NF $\kappa$ B pathway, leading to an inflammatory  
74 environment that increases microbial internalization [21, 22]. Early transcription factors

75 implicated in MSC differentiation such as, peroxisome proliferator-activated receptor gamma  
76 (PPARG) [23] and secreted phosphoprotein 1 (SPP1) [24], are involved in inflammation, and  
77 may bridge cellular response to microbe-induced inflammation in MSCs. Previously unexplored  
78 differences between the infectious route in epithelial cells and the immunomodulatory changes in  
79 MSCs during host-pathogen interaction suggest substantial stem cell conditioning by *Salmonella*.  
80 These novel observations led our group to hypothesize that microbial modulation of the immune  
81 system in MSCs provides pathogens with an uncharted method of tissue infiltration, resulting in  
82 undescribed biological impact.

83 In this study, it was hypothesized that human and goat MSCs internalize *Salmonella* that  
84 resulted MSC altered trajectories towards a pro-osteogenic commitment, in parallel with the  
85 induction of an anti-inflammatory, immunosuppressive cellular phenotype. Examination of  
86 differentiation markers, immunomodulatory regulators and inflammatory cytokines demonstrated  
87 that *Salmonella* was internalized without inducing MSC apoptosis that altered osteogenic and  
88 chondrogenic differentiation. This phenomenon extended to alter molecular mechanisms of cell  
89 survival, proliferation and immune regulation. These observations found microbial-specific  
90 alterations in MSC differentiation and inflammatory status to influence stem cell fate and  
91 functionality.

## 92 **Materials and Methods**

### 93 **Cell culture**

94 Human adipose-derived mesenchymal stem cells (hASCs) were isolated by the laboratory of Dr.  
95 Dori Borjesson (University of California, Davis) and cultured in Minimum Essential Medium  
96 Alpha Modification (MEM- $\alpha$ , HyClone) with 20% fetal bovine serum (FBS, HyClone) and 1%  
97 penicillin-streptomycin (P/S, Gibco Life Technologies). Goat adipose-derived mesenchymal

98 stem cells (gASCs) were isolated by the laboratory of Dr. Matthew Wheeler (University of  
99 Illinois, Urbana-Champaign), as described by Monaco et al. [25], and expanded as described by  
100 Mohamad-Fauzi et al. [26]. ASCs were cultured in 5% CO<sub>2</sub>/37°C, used at passage six. Colonic  
101 epithelial cells (Caco-2; ATCC HTB-37) were obtained from American Type Culture Collection  
102 (Manassas, VA) and grown as described by Shah et al. [27].

### 103 **Bacteria culture**

104 *Salmonella enterica* ssp *enterica* serotype Typhimurium LT2 (ST), 14028S, serotype Enteritidis  
105 (BCW\_4673), serotype Saint Paul (BCW\_88) and serotype Newport (BCW\_1378) were grown  
106 in Luria-Bertani (LB) broth (Teknova, Holister, CA) and incubated with shaking (200 rpm) at  
107 37°C. Cultures were grown as described by Kol et al. [15].

### 108 **Quantification of microbe association**

109 Association was determined using the gentamicin protection assay [28] and modified by Kol et  
110 al. [15], with the following modifications: ASCs were plated ( $4 \times 10^4$ ) in a 96-well plate and  
111 incubated overnight; bacteria were suspended in serum-free medium ( $10^8$  CFU/ml) and added to  
112 the ASCs (MOI 100:1).

### 113 **Transmission Electron Microscopy**

114 hASCs were plated on glass slides (Nalge Nuc International, Naperville, IL) and incubated for 2  
115 h with ST [15]. Preparation and completion of transmission electron microscopy (TEM) was  
116 conducted as outlined by Kol et al. [15].

### 117 **Differentiation**

118 Adipogenic and osteogenic differentiation was done using ASCs in 6-well plates at  $2.5 \times 10^5$   
119 ASCs/well and incubated with ST for 1 h as described above. Chondrogenic differentiation was  
120 done in T-25 flasks at  $3 \times 10^5$  ASCs/flask. Following treatment with gentamicin, ASCs were

121 washed with PBS and cultured for 48 hours in expansion medium to 70-80% confluence after  
122 which differentiation medium was added.

### 123 **Osteogenic differentiation assay**

124 ASCs were cultured in osteogenic medium, fixed, rinsed and visualized under light and phase  
125 microscopy as described in Mohamad-Fauzi et al. [26]. hASCs were cultured for 14 days,  
126 whereas gASCs were cultured for 21 days. Control, non-induced cells were cultured in  
127 expansion medium.

### 128 **Chondrogenic differentiation assay**

129 Chondrogenic differentiation was carried out as described by Zuk et al. [29]. Following ST  
130 incubation, 70-80% confluent cells were trypsinized and suspended in expansion medium for 14  
131 days and then processed and visualized as described by Mohamad-Fauzi et al. [26].

### 132 **Adipogenic differentiation assay**

133 Cells were cultured for 21 days in adipogenic induction medium, fixed, stained, and visualized as  
134 described by Mohamad-Fauzi et al. [26].

### 135 **RNA extraction and cDNA synthesis**

136 ASCs were flash frozen prior to RNA extraction. For analysis of immunomodulatory factors,  
137 ASCs were plated in 6-well plates ( $3 \times 10^5$  cells/well) and incubated with ST as described above.  
138 Treatment with LPS (Sigma) was added at 10 ng/ml. MSCs were washed with PBS, and  
139 immediately lysed with TRIzol Reagent (Life Technologies). Total RNA was extracted as  
140 described by Mohamad-Fauzi et al. [26]. Total RNA (1  $\mu$ g) was used for first-strand cDNA  
141 synthesis using SuperScript II Reverse Transcriptase (Life Technologies) and oligo-dT primers  
142 according to the manufacturer.

## 143 **Quantitative RT-PCR**

144 Primers (Supplementary Tables 1-2) were designed using Primer3 if not obtained from  
145 references. All primers spanned exon junctions or included introns. mRNA expression was  
146 quantified using Fast SYBR Green reagent (Life Technologies) on the Bio-Rad CFX96 platform  
147 (95°C for 20 seconds, 40 cycles of 95°C for 3 s and 60°C for 30 s), followed by melt curve  
148 analysis. Gene expression was normalized to GAPDH using  $2^{-\Delta\Delta CT}$  [30, 31]. Differences in  
149 differentiation gene expression were calculated as fold-changes relative to cells cultured in  
150 expansion medium (non-induced) and not treated with bacteria (non-treated). Inflammatory gene  
151 expression was calculated as fold-changes relative to non-treated control cells. Treatments were  
152 analyzed in pairwise comparisons using the Student's t-test on the software JMP (SAS Institute)  
153 ( $p \leq 0.05$ ). Data are presented as mean  $\pm$  SEM with three biological and technical replicates.

## 154 **GeneChip expression analyses**

155 Caco-2 infection samples with *Salmonella* LT2 were conducted using Affymetrix HGU133Plus2  
156 GeneChip. Custom arrays containing all annotated coding and intergenic sequences of *Salmonella*  
157 *enterica* spp. *enterica* sv Typhimurium LT2 [32-34]. Data were normalized using MS-RMA [35]  
158 and analyzed using Significance Analysis of Microarrays (SAM) [33, 36].

## 159 **hASC RNA sequencing**

160 Total RNA (1  $\mu$ g) from hASCs was used to construct sequencing libraries with the Truseq  
161 Stranded Total RNA LT Kit (Illumina). Quality of RNA and constructed libraries was  
162 determined via 2100 Bioanalyzer. Libraries sequenced using an Illumina HiSeq2000 (BGI@UC  
163 Davis, Sacramento, CA) with single-end 50 bp. Reads were aligned using the UCSC hg19  
164 human reference genome ([ftp://igeneome:G3nom3s4u@ussd-](ftp://igeneome:G3nom3s4u@ussd-ftp.illumina.com/Homo_sapiens/UCSC/hg19/Homo_sapiens_UCSC_hg19.tar.gz)  
165 [ftp.illumina.com/Homo\\_sapiens/UCSC/hg19/Homo\\_sapiens\\_UCSC\\_hg19.tar.gz](ftp.illumina.com/Homo_sapiens/UCSC/hg19/Homo_sapiens_UCSC_hg19.tar.gz)) and annotated

166 using "-a 10 --b2-very-sensitive -G". Read counts and normalization was done using Cufflinks  
167 package (version 2.2.0) with flags "-u -G". Tables from cuffnorm and cuffdiff imported into  
168 Ingenuity Pathway Analysis (IPA; Ingenuity Systems, version spring 2014). Sequence quality  
169 was examined using Phred [Supplementary Figure S1A-B].

## 170 **Ingenuity Pathway Analysis**

171 IPA was used to determine biological pathways associated with gene expression profiles.  
172 Networks represent molecular interaction based on the IPA knowledge database. Estimation of  
173 probable pathway association was determined Fisher's exact test, and predicted direction change  
174 was decided by the IPA regulation z-score algorithm (z-score  $\geq 2$  and  $\leq -2$  means a function is  
175 significantly increased or decreased, respectively) [37].

## 176 **Results**

### 177 **Microbial association with adipose-derived mesenchymal stem cells**

178 Human and goat ASCs were susceptible to *Salmonella* infection *in vitro* [Figure 1],  
179 which recapitulated previous observations in canine ASCs [15]. Total associated bacteria in both  
180 organisms were invasive; gASCs showed significantly higher invasion compared to human cells  
181 ( $P = 0.006$ ) [Figure 1A]. Microbial association was not exclusive to ST; other *Salmonella*  
182 serotypes also invaded ASCs, as did other organisms as our group demonstrated previously [15],  
183 signifying a consistent trend in ASC vulnerability to common pathogens [Figure 1B]. Utilizing  
184 TEM, intracellular ST were observed 2 h post hASC-microbe co-incubation [Figure 1C-F]. Cells  
185 were not morphologically distressed nor apoptotic. In addition to invasion, ST adherence to  
186 hASC cell surface was observed; this intimate association is consistent with other non-  
187 pathogenic bacteria that Kol et al. [15] also observed.

188 As ST is the most common cause of enteric diarrhea, we limited additional studies to this



189 serotype. Following ST co-incubation, the expression of several immunomodulatory genes was  
190 investigated [Figure 1G-H]. Interleukin 8 and 6 (*IL8*, *IL6*), prostaglandin-endoperoxide synthase  
191 2 (*PTGS2*), nuclear factor of kappa light polypeptide gene enhancer in B-cells 1 (*NFKB1*),  
192 transforming growth factor beta 1 (*TGFBI*), *PPARG* and *SPP1* were selected. gASCs and  
193 hASCs treated with ST significantly increased *IL8* expression ( $P \leq 0.033$ ,  $P \leq 0.005$ ,  
194 respectively). An increase in *IL8* was also observed in LPS-treated gASCs ( $P \leq 0.0001$ ). LPS-  
195 stimulated gASCs induced a significant increase in *IL6* ( $P = 0.0001$ ), *PTGS2* ( $P = 0.0009$ ),  
196 *NFKB1* ( $P = 0.0002$ ), *PPARG* ( $P = 0.0204$ ), *SPP1* ( $P = 0.037$ ) and *IL8* ( $P \leq 0.0001$ ) gene  
197 expression.

198 A broader analysis of gene expression using RNAseq found 118 significantly  
199 differentially expressed genes in ST/hASCs interactions ( $P \leq 0.05$ , FDR = 0.1). Canonical  
200 pathway analysis found hASCs treated with ST repressed cell death and survival genes  
201 associated with apoptosis [Figure 2]. TNF/FasL pathway analysis [Figure S2] established the  
202 muted apoptotic response in hASCs compared to Caco-2 cells following ST infection. Consistent  
203 with viability post ST association, induced genes in hASCs included repression of apoptosis,  
204 promotion of proliferation and multipotency [Figure 3.1]. Expression of heat shock protein B6  
205 (*HSPB6*) and MAP-predicted activation of *v-akt* murine thymoma viral oncogene homolog 1  
206 (*AKT1*) indicate promotion of hASC survival. *HSPB6* inhibits apoptosis of murine tumor cells,  
207 and plays a role in cellular protection against oxidative damage [38, 39]. Activated in response to  
208 a variety of cues, *AKT1* helps mediate cell survival and clonogenic potential [40-43].

209 Upregulated in ST-treated hASCs [Figure 3.1], parathyrosin (*PTMS*) is involved in  
210 molecular organization, differentiation and proliferation; nuclear translocation of *PTMS* is  
211 indicative of a pro-proliferative state [44, 45]. MAP predicted the repression of hedgehog

212 signaling (Hh), whose inhibition is reported to decrease MSC proliferation with no effect on  
213 differentiation capacity [46]. We observed an increase in expression of patched 2 (*PTCH2*),  
214 which influences epidermal differentiation and Hh activity, suggesting promotion of ASC  
215 proliferation [47].

216       Superoxide dismutase 3 (*SOD3*) is pivotal for management of cellular redox [48-50] and  
217 was induced in this study [Figure 3.2], which aligns with previous observations in INF $\gamma$ /LPS-  
218 activated microglial cells [48]. By promoting phagocytosis, EC-SOD facilitates bacteria  
219 clearance and elicits an anti-inflammatory response to LPS induced inflammation and pulmonary  
220 infection [51-53]. Interestingly, while Caco-2 cells strongly induced expression of TLR signaling  
221 which facilitates the LPS response following pathogen challenge, this observation was not seen  
222 in hASCs [Figure S3]. Using MAP, we focused on upstream regulators of *SOD3*, which may  
223 have been responsible for its activation [Figure 3.2]. Both *SOX10* and heparin sulfate (HS), play  
224 a role in the maintenance of multipotency and self-renewal [54, 55]. Interferon gamma (*INFG*)  
225 influences the immunomodulatory effects of MSC, as *INFG*-activated MSCs suppress T-cells  
226 and provide the necessary signal for MSC immunosuppression [56].

## 227 **Analysis of trilineage differentiation post-microbial association Chondrogenic**

### 228 **Differentiation**

229       ST treatment did not abate ASCs ability to undergo chondrogenesis. In hASCs,  
230 differentiated cells migrated to form ridges that stained with Alcian Blue [Figure 4.2]. The  
231 morphological changes in gASCs were more advanced compared to human cells after ridge  
232 formation, cells aggregated, forming clumps that stained positive with Alcian Blue. Control, non-  
233 induced cells remained in monolayer and exhibited minimal background staining.

234       Expression of SRY (sex determining region Y)-box 9 (*SOX9*), which is essential for

235 cartilage formation [57] and encodes for a transcription factor that promotes cartilage-specific  
236 extracellular matrix components [58, 59], was measured 14-days post chondrogenic induction. In  
237 hASCs, *SOX9* expression decreased ( $P = 0.04$ ) in cells treated with ST [Figure 5.2]. Non-induced  
238 hASCs treated with ST showed no significant change in *SOX9* expression. Chondrogenic  
239 induction increased *SOX9* expression in hASCs compared to cells treated with control medium  
240 ( $P = 0.034$ ). gASCs showed a significant decrease in *SOX9* expression in induced and non-  
241 induced ST-treated cells ( $P = 0.027$ ,  $P = 0.039$ ). There was a significant decrease in *SOX9*  
242 expression between gASCs treated with induction ( $P = 0.012$ ).

### 243 **Adipogenic Differentiation**

244 ASCs cultured in adipogenic medium accumulated lipid-filled vacuoles that stained with  
245 Oil Red O [Figure 4.3]. Visually, no differences were observed between non-induced ST-treated  
246 cells and the controls, which did not yield lipid-filled adipocytes nor stain with Oil Red O.

247 The lack of visual differentiation was further explored by examining expression of  
248 *PPARG* and fatty acid binding protein 4 (*FABP4*) 21 days post-induction, which should detect  
249 early events in adipogenesis [60, 61]. ST treatment of induced and non-induced hASCs did not  
250 change *PPARG* expression [Figure 5.3], a trend consistent with gASCs; however, a significant  
251 increase in *PPARG* expression in human and goat ASCs treated with differentiation vs. control  
252 medium ( $P \leq 0.0001$ ,  $P \leq 0.0001$ ) was observed, as expected.

253 *FABP4* is a fatty acid binding protein specific to mammalian adipose tissue [62, 63]. No  
254 significant difference was observed between induced ASCs treated with ST and non-treated  
255 control cells. Non-induced hASCs, but not gASCs, treated with ST displayed a significant  
256 increase in *FABP4* expression ( $P = 0.019$ ). Both species induced *FABP4* in cells cultured in  
257 adipogenic induction medium [Figure 5.3] ( $P = 0.029$ ,  $P \leq 0.0001$ ).

## 258 **Osteogenic Differentiation**

259 ASCs induced with osteogenic medium post ST treatment underwent osteogenesis.  
260 Mineralized calcium deposits accumulated within the monolayer and stained with Alizarin Red S  
261 [Figure 4.1]. By visual comparison, no difference was apparent between ST-treated and non-  
262 treated cells. ASCs cultured in control, expansion medium did not undergo calcium  
263 mineralization nor stain with Alizarin Red S, independent of ST treatment [Figure 4.1].

264 Collagen type I alpha 1 (*COL1A1*), alkaline phosphatase (*ALPL*) and *SPP1* expression  
265 were determined at the termination of differentiation. *COL1A1* encodes for the major component  
266 of the most abundant collagen found in bone matrix [64]. In hASCs induced for osteogenesis,  
267 *COL1A1* expression was significantly higher in ST-treated cells compared to controls ( $P =$   
268  $0.025$ ) [Figure 5.1A]. No difference in expression was detected between non-induced ST-treated  
269 and control hASCs. There was a significant decrease in *COL1A1* expression in hASCs treated  
270 with osteogenic induction vs. control medium ( $P \leq 0.0001$ ). gASCs displayed no significant  
271 change of *COL1A1* expression in induced ST treated cells [Figure 5.1B]. There was a significant  
272 decrease in *COL1A1* expression between gASCs treated with osteogenic induction vs. control  
273 medium ( $P = 0.018$ ).

274 *ALPL*, which provides phosphate ions for the production of bone mineral during matrix  
275 maturation [65-67], increased in induced hASCs ( $P = 0.02$ ) as well as ST treated-induced  
276 hASCs. *ALPL* expression was 3.3-fold higher than in non-treated cells ( $P = 0.03$ ) [Figure 5.1A].  
277 In non-induced hASCs, no significant change in *ALPL* expression was detected following ST-  
278 treatment. *ALPL* expression in gASCs was not detected.

279 *SPP1* is a non-collagenous bone protein expressed during the mineralization phase late in  
280 osteogenesis [68]. In hASCs, *SPP1* was repressed in induced cells ( $P \leq 0.0001$ ). *SPP1*

281 expression was 4.3-fold higher in induced hASCs treated with ST compared to non-treated cells  
282 ( $P = 0.002$ ). In non-induced hASCs, no difference in expression was observed between ST-  
283 treated and control cells [Figure 5.1A]. In induced gASCs, no significant change in SPP1  
284 expression was observed in ST-treated cells. However, a 7.2-fold increase in SPP1 was observed  
285 in non-induced gASCs treated with ST compared to non-treated, non-induced controls ( $P \leq 0.05$ )  
286 [Figure 5.1B].

287 Pretreatment of hASCs with ST followed by 14 days of osteogenic induction resulted in  
288 the differential expression of 1060 genes (data not shown). RNAseq-IPA regulation z-score  
289 algorithm identified associated downstream biological functions. Expression data projected the  
290 repression of genes associated with cell-to-cell signaling, inflammation and response to  
291 infectious disease [Figure 6.1], highlighting the potential anti-inflammatory phenotype of hASCs  
292 subjected to microbial association ( $P$ -value  $\leq 0.05$ , z-score  $\geq 2$ ).

293 ST treatment followed by osteogenic differentiation also influenced genes involved in  
294 cellular communication, migration and lineage commitment. Differentially expressed genes  
295 included stanniocalcin 1 (*STCI*) and mesenchyme homeobox 2 (*MEOX2*) [Figure 6.2]. MSCs  
296 secrete *STCI* in response to apoptotic signals [69]. *STCI* is reported to play a role in the  
297 suppression of inflammation and may act in the regulation of calcium and phosphate homeostasis  
298 [69, 70]. *STCI* expression was downregulated in differentiated hASCs pre-treated with ST.

299 Upregulated in ST treated osteogenic differentiated hASCs [Figure 6.2], chloride  
300 intracellular channel 4 (*CLIC4*) is induced during cellular stress and influences cell cycle arrest  
301 and apoptosis [71]. Intracellular chloride regulates cation transport and may be involved in  
302 cellular signaling; *CLIC4* expression has been reportedly associated with  $\text{Ca}^{2+}$  induced  
303 differentiation of keratinocytes [71, 72]. Macrophage migration inhibitory factor (MIF) is

304 elevated during tissue injury and inhibits MSC migration [73, 74]. Our data showed  
305 downregulation of MIF expression [Figure 6.2]. Furthermore, adhesion to fibronectin through  
306  $\alpha 5 \beta 1$ -integrin plays a part in the induction of MSC migration [75]. MSC expression of A1-3, B1,  
307 and B3/4 integrins has been reported; blocking of B1 decreased migration in bone marrow-  
308 derived MSCs [76, 77]. We detected an increase in A3, A4 and B1 integrins [Figure S5].

309 Induction of periostin (*POSTN*) following ST challenge [Figure 6.2] was observed. A  
310 regulator of Wnt/ $\beta$ -catenin signaling cascade and mediator of bone anabolism, *POSTN* increases  
311 in response to stress and tissue damage [78, 79]. Wnt pathway activity is regulated by  
312 extracellular factors, including heparin sulfate proteoglycans, and acts to control MSC  
313 proliferation and differentiation [80]. hASCs treated with ST prior to induction displayed  
314 downregulation of Wnt activator Secreted frizzled-related protein 1 (*SFRP1*) and induction of  
315 transcription factors *JUN* and *AXIN2* [Figure S4A]. In addition, we observed a marked increase  
316 in the expression of *TNFRSF11B* [Figure S4B]. Also known as osteoprotegerin, *TNFRSF11B* is  
317 an anti-osteoclastogenic regulator, which is reported to augment osteogenesis [81].

318 Ephrin-B2 (*EFNB2*) is involved in osteogenic commitment and is required for  
319 differentiation of osteoclasts and osteoblasts *in vivo* [82]. Upregulated in our data set [Figure  
320 6.2], the *EFNB2* ligand and *EPHB4* receptor are reportedly expressed on the surface of MSCs  
321 [82]. Increased expression of *COL1A2* was also detected [Figure 6.2]. *COL1A2* promotes cellular  
322 proliferation and osteogenesis, a response in part regulated by ERK/AKT1 pathway activation  
323 [83]. Activation of ERK mitogen activated protein kinase family (*MAPK*) drives the progression  
324 of osteoblasts via phosphorylation of transcription factors [77]. Overlay of hASC gene  
325 expression data illustrated upregulation of integrins involved in *MAPK1* activation as well as  
326 intracellular signal transducer phosphatidylinositol-4,5-bisphosphate 3-kinase (*PI3K*) [Figure

327 S5].

328 Consistent with MSC ability to influence the immune response, we detected expression  
329 of genes involved in MSC signaling and immunomodulation [Figure 6.2]. Cadherin 11 (*CDH11*)  
330 expression was upregulated in our dataset. TGF $\beta$  treatment increases expression of *CDH11* and  
331 subsequent calcium-dependent cell-to-cell interactions in MSCs [84]. Engagement of *CDH11* on  
332 fibroblast-like synoviocytes (FLS) has been reported to produce inflammatory mediators IL6 and  
333 IL8 [84], though our transcriptome analysis did not indicate significant upregulation of either of  
334 these cytokines. Kol et al. demonstrated that ST augments cMSCs ability to inhibit T-cell  
335 proliferation [15]. In hASCs, we observed the differential expression of genes involved in the  
336 suppression of immune cells; IPA regulator analysis highlighted the potential inhibitory effect of  
337 ST-treated hASCs on phagocyte and granulocyte proliferation [Figure S6].

### 338 **Discussion**

339 Microbial presence on host tissue presents a wide range of beneficial to pathogenic  
340 effects on cellular function. Intestinal bacteria have been shown to contribute to cellular  
341 proliferation and development; observation of host and microbe interactions during inflammatory  
342 and disease states have been imperative in refining our understating of healing and self-renewal  
343 signaling mechanisms [85]. Studies on pathogen interference on MSC functionality demonstrate  
344 the promising potential of stem cells as a mode of intercession for infection and inflammation.  
345 Yuan et al [86] illustrated the ability of bone marrow-derived MSCs to increase clearance of  
346 methicillin-resistant *Staphylococcus aureus* (MRSA) in a rat model; work by Maiti and  
347 colleagues show that MSC stimulation with MRSA resulted not only in changes to cell  
348 proliferation but also the induction of inflammatory markers [87]. Here, ASCs were susceptible  
349 to microbial infection *in vitro* with many types of *Salmonella*, suggesting this is a common

350 characteristic, especially when taken with the observations of Kol et al. [15]. Our specific  
351 investigation of ST resulted in changes in the expression of prototypical gene markers of  
352 differentiation and inflammation, but not apoptosis.

353 Fiedler et al. [14] found continuous treatment with heat-inactivated *E. coli* slightly  
354 increased ALPL activity in hASCs; heat-inactivation may have diminished the effect of bacterial  
355 exposure. The migration of MSCs to sites of inflammation, where bacterial interaction may be  
356 transient, could potentiate a narrow window of opportunity for microbial association. The use of  
357 viable bacteria and shorter exposure time in this study may better mimic the physiological  
358 conditions in which MSCs interact with microbes. We observed internalization of ST within 60  
359 minutes of co-incubation; additional investigation is required to evaluate ST presence throughout  
360 extended culture periods. ST pre-treatment did not abate the ability of ASCs to differentiate, but  
361 did affect the expression of genes involved in osteogenesis and chondrogenesis.

362 ST treatment had a significant effect on osteogenic differentiation. In congruence with  
363 Fiedler et al. [14], we observed an increase in *ALPL* expression in ST-treated hASCs induced for  
364 osteogenesis. Increase in *ALPL* expression is consistent with the finding at 10 days post-  
365 osteogenic induction in LPS-treated hASCs [16]. *ALPL* was not detected in gASCs, as cells were  
366 harvested 21 days post-induction when the mineralization phase was likely occurring [88] and  
367 *ALPL* expression may have decreased [67, 88].

368 Consistent with the lack of *ALPL*, upregulation of *SPP1* (a late marker of osteogenesis)  
369 [88, 89], was observed in ST-treated gASCs. In addition to osteogenic commitment, the 6-  
370 glycosylated phosphoprotein SPP1 has a significant role in cellular stress and immunity. As an  
371 inflammatory mediator, SPP1 is reported as anti-inflammatory in acute colitis, while having an  
372 opposite effect in chronic disease status [90, 91]. Plasma levels of SPP1 are elevated in Crohn's



373 disease and SPP1-deficient mice have an impaired ability to clear *Listeria monocytogenes* [90,  
374 92]. The upregulation of *SPP1* observed implies a diverse series of biological effect on MSC  
375 physiology. It is probable that the involvement of SPP1 in response to microbe-induced  
376 inflammation results in the influence of ASCs towards osteogenesis.

377 Differential marker expression following ST treatment was heavily observed in non-  
378 induced ASCs. Upregulation of *SPP1* was observed in ST-treated, non-induced gASCs, but not  
379 in induced cells. It is possible that the osteoinductive effect of ST treatment in induced ASCs  
380 was masked, as the medium contained additives that strongly induce osteogenesis. Pevsner-  
381 Fischer et al. [19] observed a differential effect of LPS treatment on non-induced MSCs  
382 compared to induced. Thus, the upregulation of osteogenic markers in non-induced cells  
383 highlight the direct influence of microbial treatment on ASC lineage commitment.

384 We observed a concomitant decrease in chondrogenic differentiation in response to ST  
385 treatment, as shown by a decrease in *SOX9* expression in ASCs. To our knowledge, this is the  
386 first report on the direct effect of bacterial association on MSC chondrogenesis. *SOX9* is  
387 required for commitment to chondrogenic lineage, thus murine *SOX9*-null cells do not express  
388 markers of chondrogenesis [93]. Osteogenesis and chondrogenesis are tightly coupled processes  
389 [94], both regulated by proteins in the TGF $\beta$  superfamily [95]. An inverse relationship between  
390 osteogenic and chondrogenic differentiation has been demonstrated; microRNAs targeting genes  
391 important for osteogenesis were upregulated during chondrogenesis, and vice versa [96]. This  
392 further supports the premise that ASCs pre-exposed to ST prior to induction favor characteristics  
393 of osteogenic lineage commitment.

394 Exposure to whole bacteria and microbial components are sufficient to influence ASC  
395 signaling. MSC response to microbial components is mediated by Toll-like receptors (TLRs);

396 hASCs express *TLR1-6* and *TLR9* [16]. TLR4 agonist LPS is a key component of the *Salmonella*  
397 cell wall [97]. LPS influences osteogenesis in hASCs and bone marrow-derived MSCs (BM-  
398 MSCs) by increasing mineralization, ALP activity, and expression of osteogenic markers [14, 16,  
399 98, 99]. It is possible that LPS-induced changes in differentiation are mediated by TLRs and  
400 thus, dependent on NFkB1 activation [99, 100]. In this study, we did not observe upregulation of  
401 *NFKB1* expression following ST challenge or significant induction of genes involved in TLR  
402 signaling pathway. As a rapid responder, NFkB1 proteins are available and inactive; activity  
403 depends on phosphorylation-dependent degradation of NFkB1 inhibitors, thus the lack of change  
404 in mRNA expression is not unexpected [101].

405         While the conditions of this study did not lead to an observed induction of TLR gene  
406 expression, previous reports highlight the role of TLR activation in MSC physiology. TLR2  
407 activation inhibited spontaneous adipogenic differentiation and increased osteogenesis in non-  
408 induced mouse BM-MSCs, but inhibits trilineage differentiation in induced cultures [19]. The  
409 upregulation of osteogenic markers in non-induced ST treated ASCs in this study supports this  
410 observation. Furthermore, TLR-activated MSCs recruit immune cells; TLR-activated  
411 macrophages secreted oncostatin M, a cytokine that induces osteogenic and inhibits adipogenesis  
412 in BM-MSCs [102]. MSCs deficient in myeloid differentiation primary response 88 (*MYD88*),  
413 which is crucial for TLR signaling [103], lack both osteogenic and chondrogenic potential [19],  
414 providing further evidence for linking microbe-induced TLR signaling and osteochondrogenic  
415 pathway induction.

416         Initiation of epithelial inflammation and rapid induction of pro-inflammatory cytokines  
417 via calcium-mediated activation of NFkB1 in response to *Salmonella* is documented [104, 105].  
418 A dose-dependent increase in IL8 secretion was reported in human BM-MSCs following LPS

419 treatment [106]. A hallmark of IL8 is the capacity for a variety of cells, including MSCs, to  
420 rapidly express and secrete IL8 [107]. IL8 can inhibit osteoclasts bone resorption activity, and  
421 stimulates osteoclast motility [108, 109]. Upregulation of *IL8* was detected after 14 days of  
422 osteogenic media treatment [108]. In additional support of the coordination between  
423 inflammatory and differentiation pathways, co-incubation with ST significantly increased *IL8*  
424 expression in hASCs and gASCs.

425         Coordination between inflammation and lineage commitment likely involves various  
426 small molecules. A pleiotropic cytokine, IL6 is involved in innate tissue response to injury and  
427 maintenance of undifferentiated MSCs status, and *IL6* expression decreases during osteogenic  
428 differentiation [110]. While mature osteoblasts displayed enhanced osteogenic differentiation,  
429 primitive MSCs experienced a decrease in proliferation following IL6 treatment [111], implying  
430 that IL6 influence on osteogenesis is complex and dependent on the status of targeted MSCs. In  
431 this study, a significant increase in *IL6* expression was observed in LPS-treated gASCs. A  
432 similar trend was noted in ST-treated gASCs and hASCs, although not statistically significant.  
433 This suggests that ASC response to ST infection influences the secretion of small molecules  
434 capable of cross-talk between inflammatory and differentiation pathways.

435         The transcriptome of hASCs post ST association alludes to a physiological shift in favor  
436 of cell survival and proliferation. Under oxidative stress, MSCs display a reduced ability to  
437 repair tissue and an increased propensity towards senescence [112, 113]. These conditions  
438 decrease MSC capacity for osteogenesis in favor of adipogenic commitment [113]. Through  
439 upregulation of redox mediators, hASCs appear to respond and mitigate oxidative stress, helping  
440 to insure cell viability, multipotency, and promote immune suppression. As versatile immune  
441 privileged cells, MSCs presented with microbial challenge may function as a safeguard,

442 contributing to an anti-inflammatory environment, which allows time and an atmosphere  
443 conducive for infection clearance by resident phagocytes. However, it is unlikely that hASC  
444 response to ST is without physiological consequences, as influence of inflammatory mediators  
445 on lineage commitment appears to prime hASCs towards a pro-osteogenic phenotype.

446         The direct association of ASCs with ST influences key modulators of trilineage  
447 differentiation. We illustrate that, as the pathways dictating MSC response to injury, microbial  
448 products and inflammation overlap with the regulation of cellular differentiation, exposure to  
449 bacteria alters lineage commitment. However, the extent and mechanisms responsible for  
450 eliciting changes in MSC differentiation due to microbial interaction have yet to be fully  
451 described. As ASCs are currently in contention as a powerful model for understanding the  
452 complex interaction of pathogenesis, inflammation and calcification, further investigation into  
453 the complex relationship between bacterial association and ASC physiology is imperative, as we  
454 have established that this association results in distinctive changes to MSC physiology.

#### 455 **Acknowledgments**

456         We thank Majlis Amanah Rakyat (Malaysia) and the Jastro Shields Research Fellowship,  
457 and the USDA-CREES W2171 Regional Research Project for funding a portion of the work  
458 described in this paper (NMF).

459

460 **References:**

- 461 1. Fossett, E. and W.S. Khan, *Optimising human mesenchymal stem cell numbers for*  
462 *clinical application: a literature review*. Stem Cells Int, 2012. **2012**: p. 465259.
- 463 2. Marra, K.G. and J.P. Rubin, *The potential of adipose-derived stem cells in craniofacial*  
464 *repair and regeneration*. Birth Defects Res C Embryo Today, 2012. **96**(1): p. 95-7.
- 465 3. Dominici, M., et al., *Minimal criteria for defining multipotent mesenchymal stromal*  
466 *cells. The International Society for Cellular Therapy position statement*. Cytotherapy,  
467 2006. **8**(4): p. 315-7.
- 468 4. Ortiz, L.A., et al., *Mesenchymal stem cell engraftment in lung is enhanced in response to*  
469 *bleomycin exposure and ameliorates its fibrotic effects*. Proc Natl Acad Sci U S A, 2003.  
470 **100**(14): p. 8407-11.
- 471 5. Balaji, S., S.G. Keswani, and T.M. Crombleholme, *The Role of Mesenchymal Stem Cells*  
472 *in the Regenerative Wound Healing Phenotype*. Adv Wound Care (New Rochelle), 2012.  
473 **1**(4): p. 159-165.
- 474 6. Roddy, G.W., et al., *Action at a distance: systemically administered adult*  
475 *stem/progenitor cells (MSCs) reduce inflammatory damage to the cornea without*  
476 *engraftment and primarily by secretion of TNF-alpha stimulated gene/protein 6*. Stem  
477 Cells, 2011. **29**(10): p. 1572-9.
- 478 7. Galindo, L.T., et al., *Mesenchymal stem cell therapy modulates the inflammatory*  
479 *response in experimental traumatic brain injury*. Neurol Res Int, 2011. **2011**: p. 564089.
- 480 8. Romieu-Mourez, R., et al., *Cytokine modulation of TLR expression and activation in*  
481 *mesenchymal stromal cells leads to a proinflammatory phenotype*. J Immunol, 2009.  
482 **182**(12): p. 7963-73.
- 483 9. Eggenhofer, E. and M.J. Hoogduijn, *Mesenchymal stem cell-educated macrophages*.  
484 Transplant Res, 2012. **1**(1): p. 12.
- 485 10. Krasnodembskaya, A., et al., *Antibacterial effect of human mesenchymal stem cells is*  
486 *mediated in part from secretion of the antimicrobial peptide LL-37*. Stem Cells, 2010.  
487 **28**(12): p. 2229-38.
- 488 11. Xu, X.R., et al., *Dysregulation of mucosal immune response in pathogenesis of*  
489 *inflammatory bowel disease*. World J Gastroenterol, 2014. **20**(12): p. 3255-64.
- 490 12. Semont, A., et al., *Mesenchymal stem cells increase self-renewal of small intestinal*  
491 *epithelium and accelerate structural recovery after radiation injury*. Adv Exp Med Biol,  
492 2006. **585**: p. 19-30.
- 493 13. Kim, J.M., et al., *Apoptosis of human intestinal epithelial cells after bacterial invasion*. J  
494 Clin Invest, 1998. **102**(10): p. 1815-23.
- 495 14. Fiedler, T., et al., *Impact of bacteria and bacterial components on osteogenic and*  
496 *adipogenic differentiation of adipose-derived mesenchymal stem cells*. Exp Cell Res,  
497 2013. **319**(18): p. 2883-92.
- 498 15. Kol, A., et al., *Gastrointestinal microbes interact with canine adipose-derived*  
499 *mesenchymal stem cells in vitro and enhance immunomodulatory functions*. Stem Cells  
500 Dev, 2014. **23**(16): p. 1831-43.
- 501 16. Hwa Cho, H., Y.C. Bae, and J.S. Jung, *Role of toll-like receptors on human adipose-*  
502 *derived stromal cells*. Stem Cells, 2006. **24**(12): p. 2744-52.
- 503 17. Raicevic, G., et al., *Inflammation modifies the pattern and the function of Toll-like*  
504 *receptors expressed by human mesenchymal stromal cells*. Hum Immunol, 2010. **71**(3):

- 505 p. 235-44.
- 506 18. Tomchuck, S.L., et al., *Toll-like receptors on human mesenchymal stem cells drive their*  
507 *migration and immunomodulating responses*. *Stem Cells*, 2008. **26**(1): p. 99-107.
- 508 19. Pevsner-Fischer, M., et al., *Toll-like receptors and their ligands control mesenchymal*  
509 *stem cell functions*. *Blood*, 2007. **109**(4): p. 1422-32.
- 510 20. Rivera-Chavez, F., et al., *Salmonella uses energy taxis to benefit from intestinal*  
511 *inflammation*. *PLoS Pathog*, 2013. **9**(4): p. e1003267.
- 512 21. Pilar, A.V., et al., *Active modification of host inflammation by Salmonella*. *Gut Microbes*,  
513 2013. **4**(2): p. 140-5.
- 514 22. Thiennimitr, P., S.E. Winter, and A.J. Baumler, *Salmonella, the host and its microbiota*.  
515 *Curr Opin Microbiol*, 2012. **15**(1): p. 108-14.
- 516 23. Pascual, G., et al., *A SUMOylation-dependent pathway mediates transrepression of*  
517 *inflammatory response genes by PPAR-gamma*. *Nature*, 2005. **437**(7059): p. 759-63.
- 518 24. Sabo-Attwood, T., et al., *Osteopontin modulates inflammation, mucin production, and*  
519 *gene expression signatures after inhalation of asbestos in a murine model of fibrosis*. *Am*  
520 *J Pathol*, 2011. **178**(5): p. 1975-85.
- 521 25. Monaco, E., et al., *Morphological and transcriptomic comparison of adipose and bone*  
522 *marrow derived porcine stem cells*. *The Open Tissue Engineering & Regenerative*  
523 *Medicine Journal*, 2009. **2**: p. 20-33.
- 524 26. Mohamad-Fauzi, N., et al., *Impact of source tissue and ex vivo expansion on the*  
525 *characterization of goat mesenchymal stem cells*. *J Anim Sci Biotechnol*, 2015. **6**(1): p. 1.
- 526 27. Shah, J., P.T. Desai, and B.C. Weimer, *Genetic mechanisms underlying the pathogenicity*  
527 *of cold-stressed Salmonella enterica serovar typhimurium in cultured intestinal epithelial*  
528 *cells*. *Appl Environ Microbiol*, 2014. **80**(22): p. 6943-53.
- 529 28. Elsinghorst, E.A., *Measurement of invasion by gentamicin resistance*. *Methods Enzymol*,  
530 1994. **236**: p. 405-20.
- 531 29. Zuk, P.A., et al., *Multilineage cells from human adipose tissue: implications for cell-*  
532 *based therapies*. *Tissue Eng*, 2001. **7**(2): p. 211-28.
- 533 30. Livak, K.J. and T.D. Schmittgen, *Analysis of relative gene expression data using real-*  
534 *time quantitative PCR and the 2(-Delta Delta C(T)) Method*. *Methods*, 2001. **25**(4): p.  
535 402-8.
- 536 31. Schmittgen, T.D. and K.J. Livak, *Analyzing real-time PCR data by the comparative C(T)*  
537 *method*. *Nat Protoc*, 2008. **3**(6): p. 1101-8.
- 538 32. Shah, J., et al., *Preadaptation to cold stress in Salmonella enterica serovar Typhimurium*  
539 *increases survival during subsequent acid stress exposure*. *Appl Environ Microbiol*,  
540 2013. **79**(23): p. 7281-9.
- 541 33. Ng, K.M., et al., *Microbiota-liberated host sugars facilitate post-antibiotic expansion of*  
542 *enteric pathogens*. *Nature*, 2013. **502**(7469): p. 96-9.
- 543 34. Marcobal, A., et al., *Bacteroides in the infant gut consume milk oligosaccharides via*  
544 *mucus-utilization pathways*. *Cell Host Microbe*, 2011. **10**(5): p. 507-14.
- 545 35. Stevens, J.R., Balasubramanian Ganesan, Prerak Desai, Sweta Rao, and Bart C.  
546 Weimer. . *Statistical issues for normalization of multi-species microarray data*. . in  
547 *Nineteenth Annual Kansas State University Conference on Applied Statistics in*  
548 *Agriculture*. . 2008. Kansas State University
- 549 36. Champine, P.J., et al., *Microarray analysis reveals potential mechanisms of BRMS1-*  
550 *mediated metastasis suppression*. *Clin Exp Metastasis*, 2007. **24**(7): p. 551-65.

- 551 37. St-Pierre, C., et al., *Transcriptome sequencing of neonatal thymic epithelial cells*. Sci  
552 Rep, 2013. **3**: p. 1860.
- 553 38. Ghulmiyyah, L.M., et al., *The role of oxidative stress in the developmental origin of adult*  
554 *hypertension*. Am J Obstet Gynecol, 2011. **205**(2): p. 155 e7-11.
- 555 39. Chen, S., et al., *Heat shock protein B6 potently increases non-small cell lung cancer*  
556 *growth*. Mol Med Rep, 2014. **10**(2): p. 677-82.
- 557 40. Gharibi, B., et al., *Inhibition of Akt/mTOR attenuates age-related changes in*  
558 *mesenchymal stem cells*. Stem Cells, 2014. **32**(8): p. 2256-66.
- 559 41. Liu, P., et al., *Cell-cycle-regulated activation of Akt kinase by phosphorylation at its*  
560 *carboxyl terminus*. Nature, 2014. **508**(7497): p. 541-5.
- 561 42. Song, G., G. Ouyang, and S. Bao, *The activation of Akt/PKB signaling pathway and cell*  
562 *survival*. J Cell Mol Med, 2005. **9**(1): p. 59-71.
- 563 43. Xu, N., et al., *Akt: a double-edged sword in cell proliferation and genome stability*. J  
564 Oncol, 2012. **2012**: p. 951724.
- 565 44. Hannappel, E. and T. Huff, *The thymosins. Prothymosin alpha, parathymosin, and beta-*  
566 *thymosins: structure and function*. Vitam Horm, 2003. **66**: p. 257-96.
- 567 45. Okamoto, K. and F. Isohashi, *Purification and primary structure of a macromolecular-*  
568 *translocation inhibitor II of glucocorticoid-receptor binding to nuclei from rat liver.*  
569 *Inhibitor II is the 11.5-kDa Zn<sup>2+</sup>-binding protein (parathymosin)*. Eur J Biochem, 2000.  
570 **267**(1): p. 155-62.
- 571 46. Plaisant, M., et al., *Inhibition of hedgehog signaling decreases proliferation and*  
572 *clonogenicity of human mesenchymal stem cells*. PLoS One, 2011. **6**(2): p. e16798.
- 573 47. Adolphe, C., et al., *Patched 1 and patched 2 redundancy has a key role in regulating*  
574 *epidermal differentiation*. J Invest Dermatol, 2014. **134**(7): p. 1981-90.
- 575 48. Kemp, K., et al., *Inflammatory cytokine induced regulation of superoxide dismutase 3*  
576 *expression by human mesenchymal stem cells*. Stem Cell Rev, 2010. **6**(4): p. 548-59.
- 577 49. Kemp, K., et al., *Mesenchymal stem cell-secreted superoxide dismutase promotes*  
578 *cerebellar neuronal survival*. J Neurochem, 2010. **114**(6): p. 1569-80.
- 579 50. Kwon, M.J., et al., *Role of superoxide dismutase 3 in skin inflammation*. J Dermatol Sci,  
580 2012. **67**(2): p. 81-7.
- 581 51. Bowler, R.P., et al., *Extracellular superoxide dismutase attenuates lipopolysaccharide-*  
582 *induced neutrophilic inflammation*. Am J Respir Cell Mol Biol, 2004. **31**(4): p. 432-9.
- 583 52. Kim, Y., et al., *Regulation of skin inflammation and angiogenesis by EC-SOD via HIF-*  
584 *1alpha and NF-kappaB pathways*. Free Radic Biol Med, 2011. **51**(11): p. 1985-95.
- 585 53. Manni, M.L., et al., *Extracellular superoxide dismutase in macrophages augments*  
586 *bacterial killing by promoting phagocytosis*. Am J Pathol, 2011. **178**(6): p. 2752-9.
- 587 54. Helledie, T., et al., *Heparan sulfate enhances the self-renewal and therapeutic potential*  
588 *of mesenchymal stem cells from human adult bone marrow*. Stem Cells Dev, 2012.  
589 **21**(11): p. 1897-910.
- 590 55. Shakhova, O. and L. Sommer, *Neural crest-derived stem cells*, in *StemBook*. 2008:  
591 Cambridge (MA).
- 592 56. Sivanathan, K.N., et al., *Interferon-gamma modification of mesenchymal stem cells:*  
593 *implications of autologous and allogeneic mesenchymal stem cell therapy in*  
594 *allogeneic transplantation*. Stem Cell Rev, 2014. **10**(3): p. 351-75.
- 595 57. Bi, W., et al., *Sox9 is required for cartilage formation*. Nat Genet, 1999. **22**(1): p. 85-9.
- 596 58. Bell, D.M., et al., *SOX9 directly regulates the type-II collagen gene*. Nat Genet, 1997.

- 597 **16(2): p. 174-8.**
- 598 59. Han, Y. and V. Lefebvre, *L-Sox5 and Sox6 drive expression of the aggrecan gene in*
- 599 *cartilage by securing binding of Sox9 to a far-upstream enhancer.* Mol Cell Biol, 2008.
- 600 **28(16): p. 4999-5013.**
- 601 60. Shin, J., et al., *Comparative analysis of fatty acid-binding protein 4 promoters:*
- 602 *conservation of peroxisome proliferator-activated receptor binding sites.* J Anim Sci,
- 603 2009. **87(12): p. 3923-34.**
- 604 61. Shi, H., et al., *PPAR gamma Regulates Genes Involved in Triacylglycerol Synthesis and*
- 605 *Secretion in Mammary Gland Epithelial Cells of Dairy Goats.* PPAR Res, 2013. **2013:** p.
- 606 310948.
- 607 62. Bakhtiarizadeh, M.R., M. Moradi-Shahrbabak, and E. Ebrahimie, *Underlying functional*
- 608 *genomics of fat deposition in adipose tissue.* Gene, 2013. **521(1): p. 122-8.**
- 609 63. Bernlohr, D.A., et al., *Tissue specific expression of p422 protein, a putative lipid carrier,*
- 610 *in mouse adipocytes.* Biochem Biophys Res Commun, 1985. **132(2): p. 850-5.**
- 611 64. Viguet-Carrin, S., P. Garnero, and P.D. Delmas, *The role of collagen in bone strength.*
- 612 *Osteoporos Int*, 2006. **17(3): p. 319-36.**
- 613 65. de Bernard, B., et al., *Biochemical and immunohistochemical evidence that in cartilage*
- 614 *an alkaline phosphatase is a Ca<sup>2+</sup>-binding glycoprotein.* J Cell Biol, 1986. **103(4): p.**
- 615 **1615-23.**
- 616 66. Tenenbaum, H.C. and J.N. Heersche, *Differentiation of osteoblasts and formation of*
- 617 *mineralized bone in vitro.* Calcif Tissue Int, 1982. **34(1): p. 76-9.**
- 618 67. Choi, J.Y., et al., *Expression patterns of bone-related proteins during osteoblastic*
- 619 *differentiation in MC3T3-E1 cells.* J Cell Biochem, 1996. **61(4): p. 609-18.**
- 620 68. Nagata, T., et al., *Biosynthesis of bone proteins [SPP-1 (secreted phosphoprotein-1,*
- 621 *osteopontin), BSP (bone sialoprotein) and SPARC (osteonectin)] in association with*
- 622 *mineralized-tissue formation by fetal-rat calvarial cells in culture.* Biochem J, 1991. **274**
- 623 **( Pt 2): p. 513-20.**
- 624 69. Kim, S.J., et al., *Stanniocalcin-1 protects retinal ganglion cells by inhibiting apoptosis*
- 625 *and oxidative damage.* PLoS One, 2013. **8(5): p. e63749.**
- 626 70. Block, G.J., et al., *Multipotent stromal cells are activated to reduce apoptosis in part by*
- 627 *upregulation and secretion of stanniocalcin-1.* Stem Cells, 2009. **27(3): p. 670-81.**
- 628 71. Suh, K.S., et al., *CLIC4, an intracellular chloride channel protein, is a novel molecular*
- 629 *target for cancer therapy.* J Invest Dermatol Symp Proc, 2005. **10(2): p. 105-9.**
- 630 72. Suh, K.S., et al., *CLIC4 mediates and is required for Ca<sup>2+</sup>-induced keratinocyte*
- 631 *differentiation.* J Cell Sci, 2007. **120(Pt 15): p. 2631-40.**
- 632 73. Xiong, C.J., et al., *Macrophage migration inhibitory factor inhibits the migration of*
- 633 *cartilage end plate-derived stem cells by reacting with CD74.* PLoS One, 2012. **7(8): p.**
- 634 **e43984.**
- 635 74. Fischer-Valuck, B.W., et al., *Migratory response of mesenchymal stem cells to*
- 636 *macrophage migration inhibitory factor and its antagonist as a function of colony-*
- 637 *forming efficiency.* Biotechnol Lett, 2010. **32(1): p. 19-27.**
- 638 75. Veevers-Lowe, J., et al., *Mesenchymal stem cell migration is regulated by fibronectin*
- 639 *through alpha5beta1-integrin-mediated activation of PDGFR-beta and potentiation of*
- 640 *growth factor signals.* J Cell Sci, 2011. **124(Pt 8): p. 1288-300.**
- 641 76. Ip, J.E., et al., *Mesenchymal stem cells use integrin beta1 not CXC chemokine receptor 4*
- 642 *for myocardial migration and engraftment.* Mol Biol Cell, 2007. **18(8): p. 2873-82.**



- 643 77. Salasznyk, R.M., et al., *ERK signaling pathways regulate the osteogenic differentiation*  
644 *of human mesenchymal stem cells on collagen I and vitronectin*. Cell Commun Adhes,  
645 2004. **11**(5-6): p. 137-53.
- 646 78. Bonnet, N., S.J. Conway, and S.L. Ferrari, *Regulation of beta catenin signaling and*  
647 *parathyroid hormone anabolic effects in bone by the matricellular protein periostin*. Proc  
648 Natl Acad Sci U S A, 2012. **109**(37): p. 15048-53.
- 649 79. Cho, Y.H., et al., *Enhancement of MSC adhesion and therapeutic efficiency in ischemic*  
650 *heart using lentivirus delivery with periostin*. Biomaterials, 2012. **33**(5): p. 1376-85.
- 651 80. Ling, L., V. Nurcombe, and S.M. Cool, *Wnt signaling controls the fate of mesenchymal*  
652 *stem cells*. Gene, 2009. **433**(1-2): p. 1-7.
- 653 81. Palumbo, S. and W.J. Li, *Osteoprotegerin enhances osteogenesis of human mesenchymal*  
654 *stem cells*. Tissue Eng Part A, 2013. **19**(19-20): p. 2176-87.
- 655 82. Tierney, E.G., et al., *High levels of ephrinB2 over-expression increases the osteogenic*  
656 *differentiation of human mesenchymal stem cells and promotes enhanced cell mediated*  
657 *mineralisation in a polyethyleneimine-ephrinB2 gene-activated matrix*. J Control Release,  
658 2013. **165**(3): p. 173-82.
- 659 83. Tsai, K.S., et al., *Type I collagen promotes proliferation and osteogenesis of human*  
660 *mesenchymal stem cells via activation of ERK and Akt pathways*. J Biomed Mater Res A,  
661 2010. **94**(3): p. 673-82.
- 662 84. Park, S.J., et al., *Interaction of mesenchymal stem cells with fibroblast-like synoviocytes*  
663 *via cadherin-11 promotes angiogenesis by enhanced secretion of placental growth factor*.  
664 J Immunol, 2014. **192**(7): p. 3003-10.
- 665 85. Sun, J., *Enteric bacteria and cancer stem cells*. Cancers (Basel), 2010. **3**(1): p. 285-97.
- 666 86. Yuan, Y., et al., *Marrow mesenchymal stromal cells reduce methicillin-resistant*  
667 *Staphylococcus aureus infection in rat models*. Cytotherapy, 2014. **16**(1): p. 56-63.
- 668 87. Maiti, A. and W.A. Jiranek, *Inhibition of Methicillin-resistant Staphylococcus aureus-*  
669 *induced cytokines mRNA production in human bone marrow derived mesenchymal stem*  
670 *cells by 1,25-dihydroxyvitamin D3*. BMC Cell Biol, 2014. **15**: p. 11.
- 671 88. Owen, T.A., et al., *Progressive development of the rat osteoblast phenotype in vitro:*  
672 *reciprocal relationships in expression of genes associated with osteoblast proliferation*  
673 *and differentiation during formation of the bone extracellular matrix*. J Cell Physiol,  
674 1990. **143**(3): p. 420-30.
- 675 89. Cowles, E.A., et al., *Mineralization and the expression of matrix proteins during in vivo*  
676 *bone development*. Calcif Tissue Int, 1998. **62**(1): p. 74-82.
- 677 90. Wang, K.X. and D.T. Denhardt, *Osteopontin: role in immune regulation and stress*  
678 *responses*. Cytokine Growth Factor Rev, 2008. **19**(5-6): p. 333-45.
- 679 91. Zou, C., et al., *Osteopontin promotes mesenchymal stem cell migration and lessens cell*  
680 *stiffness via integrin beta1, FAK, and ERK pathways*. Cell Biochem Biophys, 2013.  
681 **65**(3): p. 455-62.
- 682 92. Ashkar, S., et al., *Eta-1 (osteopontin): an early component of type-1 (cell-mediated)*  
683 *immunity*. Science, 2000. **287**(5454): p. 860-4.
- 684 93. Akiyama, H., *Control of chondrogenesis by the transcription factor Sox9*. Mod  
685 Rheumatol, 2008. **18**(3): p. 213-9.
- 686 94. Joyce, M.E., et al., *Transforming growth factor-beta and the initiation of chondrogenesis*  
687 *and osteogenesis in the rat femur*. J Cell Biol, 1990. **110**(6): p. 2195-207.
- 688 95. Wan, M. and X. Cao, *BMP signaling in skeletal development*. Biochem Biophys Res

- 689 Commun, 2005. **328**(3): p. 651-7.
- 690 96. Suomi, S., et al., *MicroRNAs regulate osteogenesis and chondrogenesis of mouse bone*  
691 *marrow stromal cells*. Gene Regul Syst Bio, 2008. **2**: p. 177-91.
- 692 97. Hoshino, K., et al., *Cutting edge: Toll-like receptor 4 (TLR4)-deficient mice are*  
693 *hyporesponsive to lipopolysaccharide: evidence for TLR4 as the Lps gene product*. J  
694 Immunol, 1999. **162**(7): p. 3749-52.
- 695 98. Raicevic, G., et al., *Inflammation and Toll-like receptor ligation differentially affect the*  
696 *osteogenic potential of human mesenchymal stromal cells depending on their tissue*  
697 *origin*. Tissue Eng Part A, 2012. **18**(13-14): p. 1410-8.
- 698 99. Cho, H.H., et al., *NF-kappaB activation stimulates osteogenic differentiation of*  
699 *mesenchymal stem cells derived from human adipose tissue by increasing TAZ*  
700 *expression*. J Cell Physiol, 2010. **223**(1): p. 168-77.
- 701 100. Kawai, T. and S. Akira, *Signaling to NF-kappaB by Toll-like receptors*. Trends Mol Med,  
702 2007. **13**(11): p. 460-9.
- 703 101. Oeckinghaus, A. and S. Ghosh, *The NF-kappaB family of transcription factors and its*  
704 *regulation*. Cold Spring Harb Perspect Biol, 2009. **1**(4): p. a000034.
- 705 102. Guihard, P., et al., *Induction of osteogenesis in mesenchymal stem cells by activated*  
706 *monocytes/macrophages depends on oncostatin M signaling*. Stem Cells, 2012. **30**(4): p.  
707 762-72.
- 708 103. Kawai, T., et al., *Unresponsiveness of MyD88-deficient mice to endotoxin*. Immunity,  
709 1999. **11**(1): p. 115-22.
- 710 104. Gewirtz, A.T., et al., *Salmonella typhimurium induces epithelial IL-8 expression via*  
711 *Ca(2+)-mediated activation of the NF-kappaB pathway*. J Clin Invest, 2000. **105**(1): p.  
712 79-92.
- 713 105. Eckmann, L., M.F. Kagnoff, and J. Fierer, *Epithelial cells secrete the chemokine*  
714 *interleukin-8 in response to bacterial entry*. Infect Immun, 1993. **61**(11): p. 4569-74.
- 715 106. Rougier, F., et al., *IL-6 and IL-8 production by human bone marrow stromal cells*.  
716 Cytokine, 1998. **10**(2): p. 93-7.
- 717 107. Hoffmann, E., et al., *Multiple control of interleukin-8 gene expression*. J Leukoc Biol,  
718 2002. **72**(5): p. 847-55.
- 719 108. Sumanasinghe, R.D., et al., *Expression of proinflammatory cytokines by human*  
720 *mesenchymal stem cells in response to cyclic tensile strain*. J Cell Physiol, 2009. **219**(1):  
721 p. 77-83.
- 722 109. Fuller, K., J.M. Owens, and T.J. Chambers, *Macrophage inflammatory protein-1 alpha*  
723 *and IL-8 stimulate the motility but suppress the resorption of isolated rat osteoclasts*. J  
724 Immunol, 1995. **154**(11): p. 6065-72.
- 725 110. Pricola, K.L., et al., *Interleukin-6 maintains bone marrow-derived mesenchymal stem cell*  
726 *stemness by an ERK1/2-dependent mechanism*. J Cell Biochem, 2009. **108**(3): p. 577-88.
- 727 111. Cho, T.J., et al., *Expression and role of interleukin-6 in distraction osteogenesis*. Calcif  
728 Tissue Int, 2007. **80**(3): p. 192-200.
- 729 112. Zhu, W., et al., *Hypoxia and serum deprivation-induced apoptosis in mesenchymal stem*  
730 *cells*. Stem Cells, 2006. **24**(2): p. 416-25.
- 731 113. Kim, D.H., et al., *Epoxyeicosatrienoic acid agonist regulates human mesenchymal stem*  
732 *cell-derived adipocytes through activation of HO-1-pAKT signaling and a decrease in*  
733 *PPARgamma*. Stem Cells Dev, 2010. **19**(12): p. 1863-73.

734

735 **Figure Legends:**

736 **Figure 1: Microbial Association with human and goat ASCs (A-F).** ASCs presented a

737 uniform pattern of *Salmonella enterica ssp enterica* serotype Typhimurium LT2 (ST)

738 infection, the total associated bacteria were invaded, gASC show significantly higher invasion

739 compared to human cells (A). ASCs susceptibility to invasion was not exclusive to ST,

740 association patterns were microbe specific; 35%, 12% *Salmonella enterica ssp enterica* serotype

741 Typhimurium 14028, and 25%, 100% *Salmonella enterica ssp enterica* serotype Enteritidis

742 (BCW\_4673) were invaded in goat and human ASCs respectively (B). In gASCs, 35%

743 *Salmonella enterica ssp enterica* serotype Newport (BCW\_1378) and in hASCs, 7% of

744 *Salmonella enterica ssp enterica* serotype Saint Paul (BCW\_88) were invaded (B). Intracellular

745 ST was observed by TEM two hours post MSC co-incubation (D-F), consistent with control non-

746 treated hASCs (C), ST infected cells showed no signs of cellular toxicity (D-F). ST adherence to

747 hASC was observed at various sites (E-F). **Expression of immunomodulatory factors in ASCs**

748 **post-microbial association (G-H).** Quantitative PCR analysis of IL6, PTGS2, NFKB1, TGFB1,

749 PPARG, SPP1, and IL8 expression in (G) goat and (H) human ASCs treated with ST or LPS.

750 Data is presented as fold change ( $\pm$  SEM) in relative to expression levels in non-treated cells

751 (“C”) (fold change  $\sim$ 1, indicated by the dotted line). Statistical significance of  $P < 0.05$  is

752 denoted by an asterisk (\*), and  $P < 0.01$  denoted by two asterisks (\*\*).

753 **Figure 2: Downstream trends analysis of differentially expressed genes in hASCs post**

754 **microbial challenge.** The IPA regulation z-score algorithm was used to identify biological

755 functions expected to increase or decrease based on the gene expression changes described in our

756 dataset. Predictions base on p-value and z-score; positive z-score implies an increase in the

757 predicted function, a negative z-score a decrease (z-score  $\geq 2$  or  $\leq -2$  represented by orange

758 dotted lines). P-values  $\leq 0.05$  (red dots determined by Fischer's exact test), illustrate a significant

759 association between a given biological function and genes differentially expressed in our dataset  
760 ( $P \leq 0.05$ ).

761 **Figure 3.1: Network displays interactions between genes regulating cell cycle, cellular**  
762 **assembly and organization that were differentially expressed in hASCs treated for sixty**  
763 **minutes with ST compared with untreated control.** Upregulated genes are colored in shades  
764 of red, down regulated in shades of green ( $P \leq 0.05$ ). IPA inserted Genes in white because they  
765 are connected to this network; dashed and solid lines denote indirect and direct relationships  
766 between molecules. The IPA molecule activity predictor assessed the activity of molecules  
767 strongly connected to this network; blue and orange colored molecules are predicted to have  
768 decreased and increased activity, respectively.

769 **Figure 3.2: Up regulation of superoxide dismutase 3 (SOD3) in hASCs following microbial**  
770 **challenge.** The IPA molecule activity predictor assessed the activity of molecules strongly  
771 connected to SOD3 (colored in shade or red); orange colored molecules are predicted to have an  
772 increased activity, based on the increased expression of SOD3 in our dataset. IPA inserted Genes  
773 colored in white because they are connected to this network; dashed and solid lines denote  
774 indirect and direct relationships between molecules.

775 **Figure 4: Trilineage staining of human and goat ASCs.** Alizarin Red S staining of osteogenic  
776 differentiation in ASCs post-microbial association (4.1). hASCs (A-D) were cultured in  
777 osteogenic differentiation medium for 14 days, whereas gASCs (E-H) for 21 days and stained  
778 with Alizarin Red S. ASCs cultured in osteoinductive medium stained positive for calcium, (A-B  
779 and E-F, respectively), but did not stain when cultured in control medium (C-D and G-H,  
780 respectively), regardless of ST treatment. Representative images are shown in phase contrast at  
781 40X magnification (scale bars represent 500  $\mu\text{m}$ ). Figure 4.2. Alcian Blue staining of

782 chondrogenic differentiation in ASCs post-microbial association. Human (A-D) and goat (E-H)  
783 ASCs were cultured in chondrogenic differentiation medium for 14 days, and subsequently  
784 stained with Alcian Blue. Cellular condensation, as well ridge and micromass formations that  
785 stain positive was observed in human and goat ASCs induced for chondrogenesis (A-B and E-F,  
786 respectively), independent of ST treatment. Some background staining was observed in ST-  
787 treated and non-treated cells cultured in control medium, but cells remained in monolayer (C-D  
788 and G-H, respectively). Representative images are shown in phase contrast at 40X magnification  
789 (scale bars represent 500  $\mu\text{m}$ ). Figure 4.3 Oil Red O staining of adipogenic differentiation in  
790 ASCs post-microbial association. hASCs (A-D) and gASCs (E-H) were cultured in adipogenic  
791 induction medium for 21 days, and stained with Oil Red O. Accumulation of cytoplasmic lipid  
792 droplets were observed in ASCs induced for adipogenesis (A-B and E-F, respectively),  
793 independent of ST treatment. ST-treated and non-treated ASCs cultured in control medium did  
794 not yield lipid-positive cells (C-D and G-H, respectively). Representative images are shown in  
795 bright field at 200X magnification (scale bars represent 100  $\mu\text{m}$ ).

796 **Figure 5: ASC expression of trilineage differentiation markers.** Figure 5.1 Expression of  
797 osteogenic markers in ASCs post-microbial association. Quantitative PCR analysis of COL1A1,  
798 ALPL and SPP1 gene expression in A) human and B) goat ASCs induced with osteogenic  
799 differentiation medium and/or treated with S.T. Figure 5.2 Expression of chondrogenic markers  
800 post-microbial association. Quantitative PCR analysis of SOX9 expression in A) human and B)  
801 goat ASCs induced with chondrogenic differentiation medium and/or treated with S.T. Figure  
802 5.3 Expression of adipogenic markers in ASCs post-microbial association. Quantitative PCR  
803 analysis of PPARG and FABP4 expression in A) human and B) goat ASCs induced with  
804 adipogenic induction medium and/or treated with ST. Data is presented as fold change ( $\pm$  SEM)

805 relative to expression levels in non-treated, non-induced cells (fold change  $\sim 1$ , indicated by the  
806 dotted line). Statistical significance of  $P < 0.05$  is denoted by an asterisk (\*), and  $P < 0.01$   
807 denoted by two asterisks (\*\*).

808 **Figure 6.1: Downstream trends analysis of differentially expressed genes in hASCs induced**  
809 **towards osteogenesis post microbial challenge.** The IPA regulation z-score algorithm was used  
810 to identify biological functions expected to increase or decrease based on the gene expression  
811 changes observed in our dataset. Predictions base on p-value and z-score; positive z-score  
812 implies an increase in the predicted function, a negative z-score a decrease (z-score  $\geq 2$  or  $\leq -2$   
813 represented by orange dotted lines). P-values  $\leq 0.05$  (red dots determined by Fischer's exact test),  
814 illustrate a significant association between a given biological function and genes differentially  
815 expressed in our dataset ( $P \leq 0.05$ ).

816 **Figure 6.2: Network displays interactions between genes involved in cell signaling,**  
817 **migration and differentiation that were differentially expressed in hASCs induced towards**  
818 **an osteogenic lineage following ST challenge.** Up-regulated genes are colored in shades of red,  
819 down-regulated in shades of green. Genes in white were inserted by IPA because they are  
820 connected to this network; dashed and solid lines denote indirect and direct relationships  
821 between molecules. The IPA molecule activity predictor assessed the activity of molecules  
822 strongly connected to this network; blue and orange colored molecules are predicted to have  
823 decreased and increased activity, respectively.

824

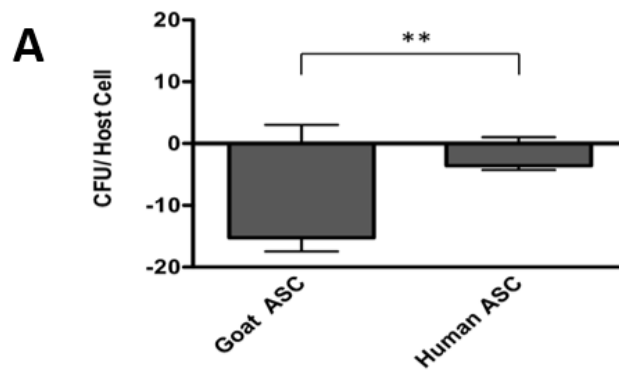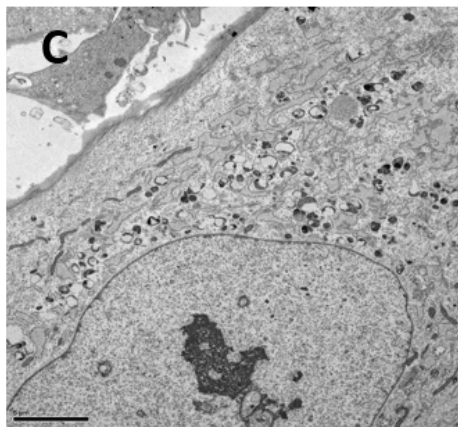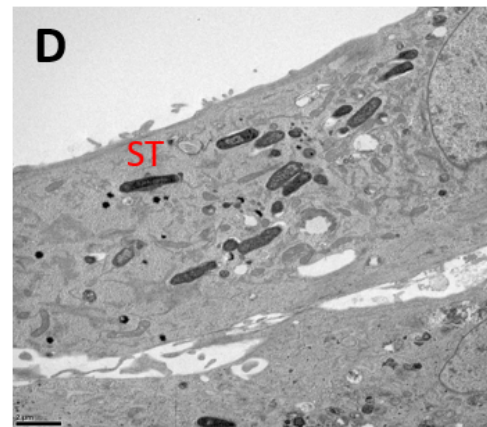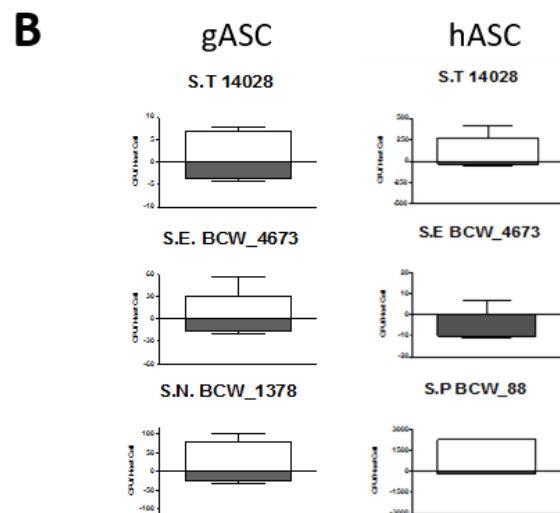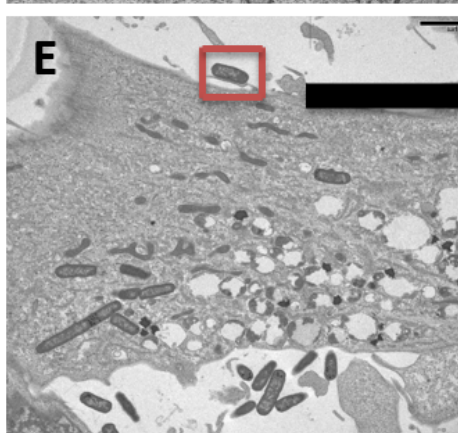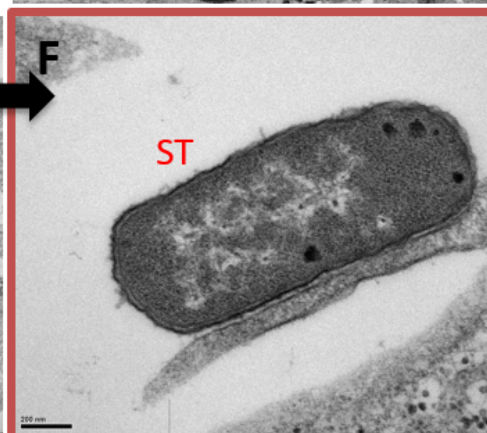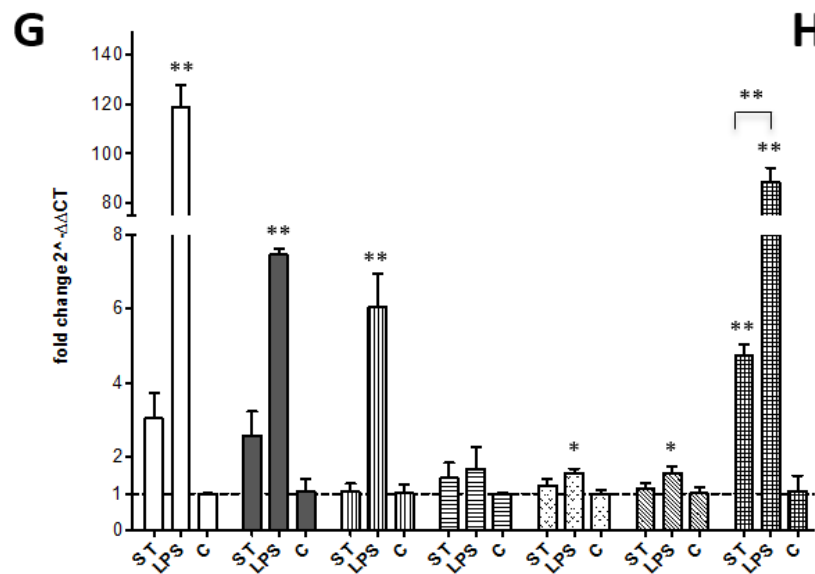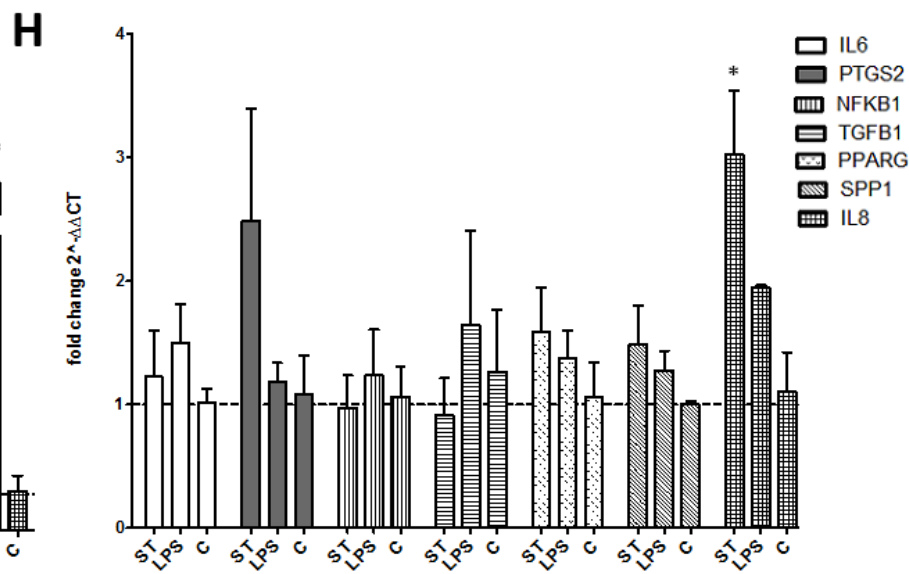

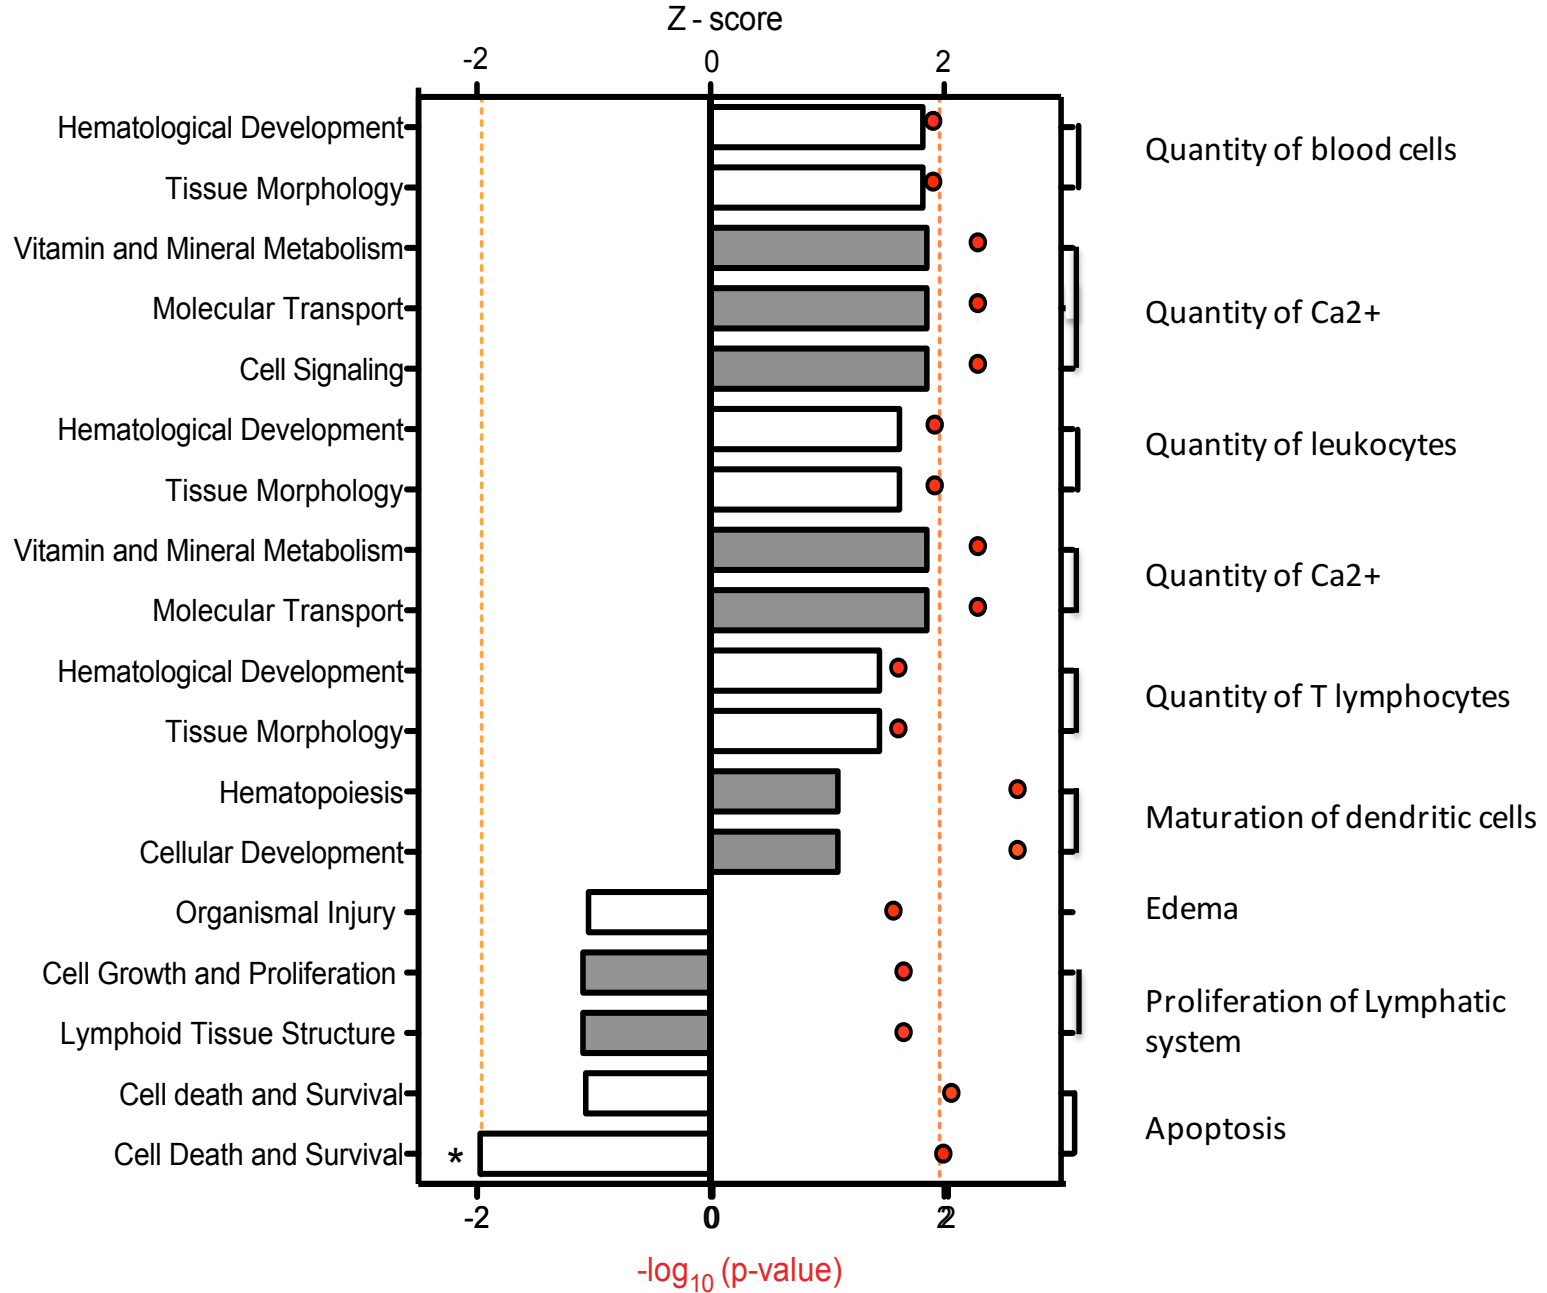



**Path Designer Shapes**

- Complex/Group/Other
- Chemical/Toxicant
- Cytokine/Growth Factor
- Disease
- Drug
- Enzyme
- Function
- G-protein Coupled Receptor
- Ion Channel
- Kinase
- Ligand-dependent Nuclear Receptor
- Mature microRNA
- microRNA
- Peptidase
- Phosphatase
- Transcription Regulator
- Translation Regulator
- Transmembrane Receptor
- Transporter

**Prediction Legend**

|                      |      |
|----------------------|------|
| more extreme         | less |
| Upregulated          |      |
| Downregulated        |      |
| more confidence      | less |
| Predicted activation |      |
| Predicted inhibition |      |

**Predicted Relationships**

- Leads to activation
- Leads to inhibition
- Findings inconsistent with state of downstream molecule
- Effect not predicted

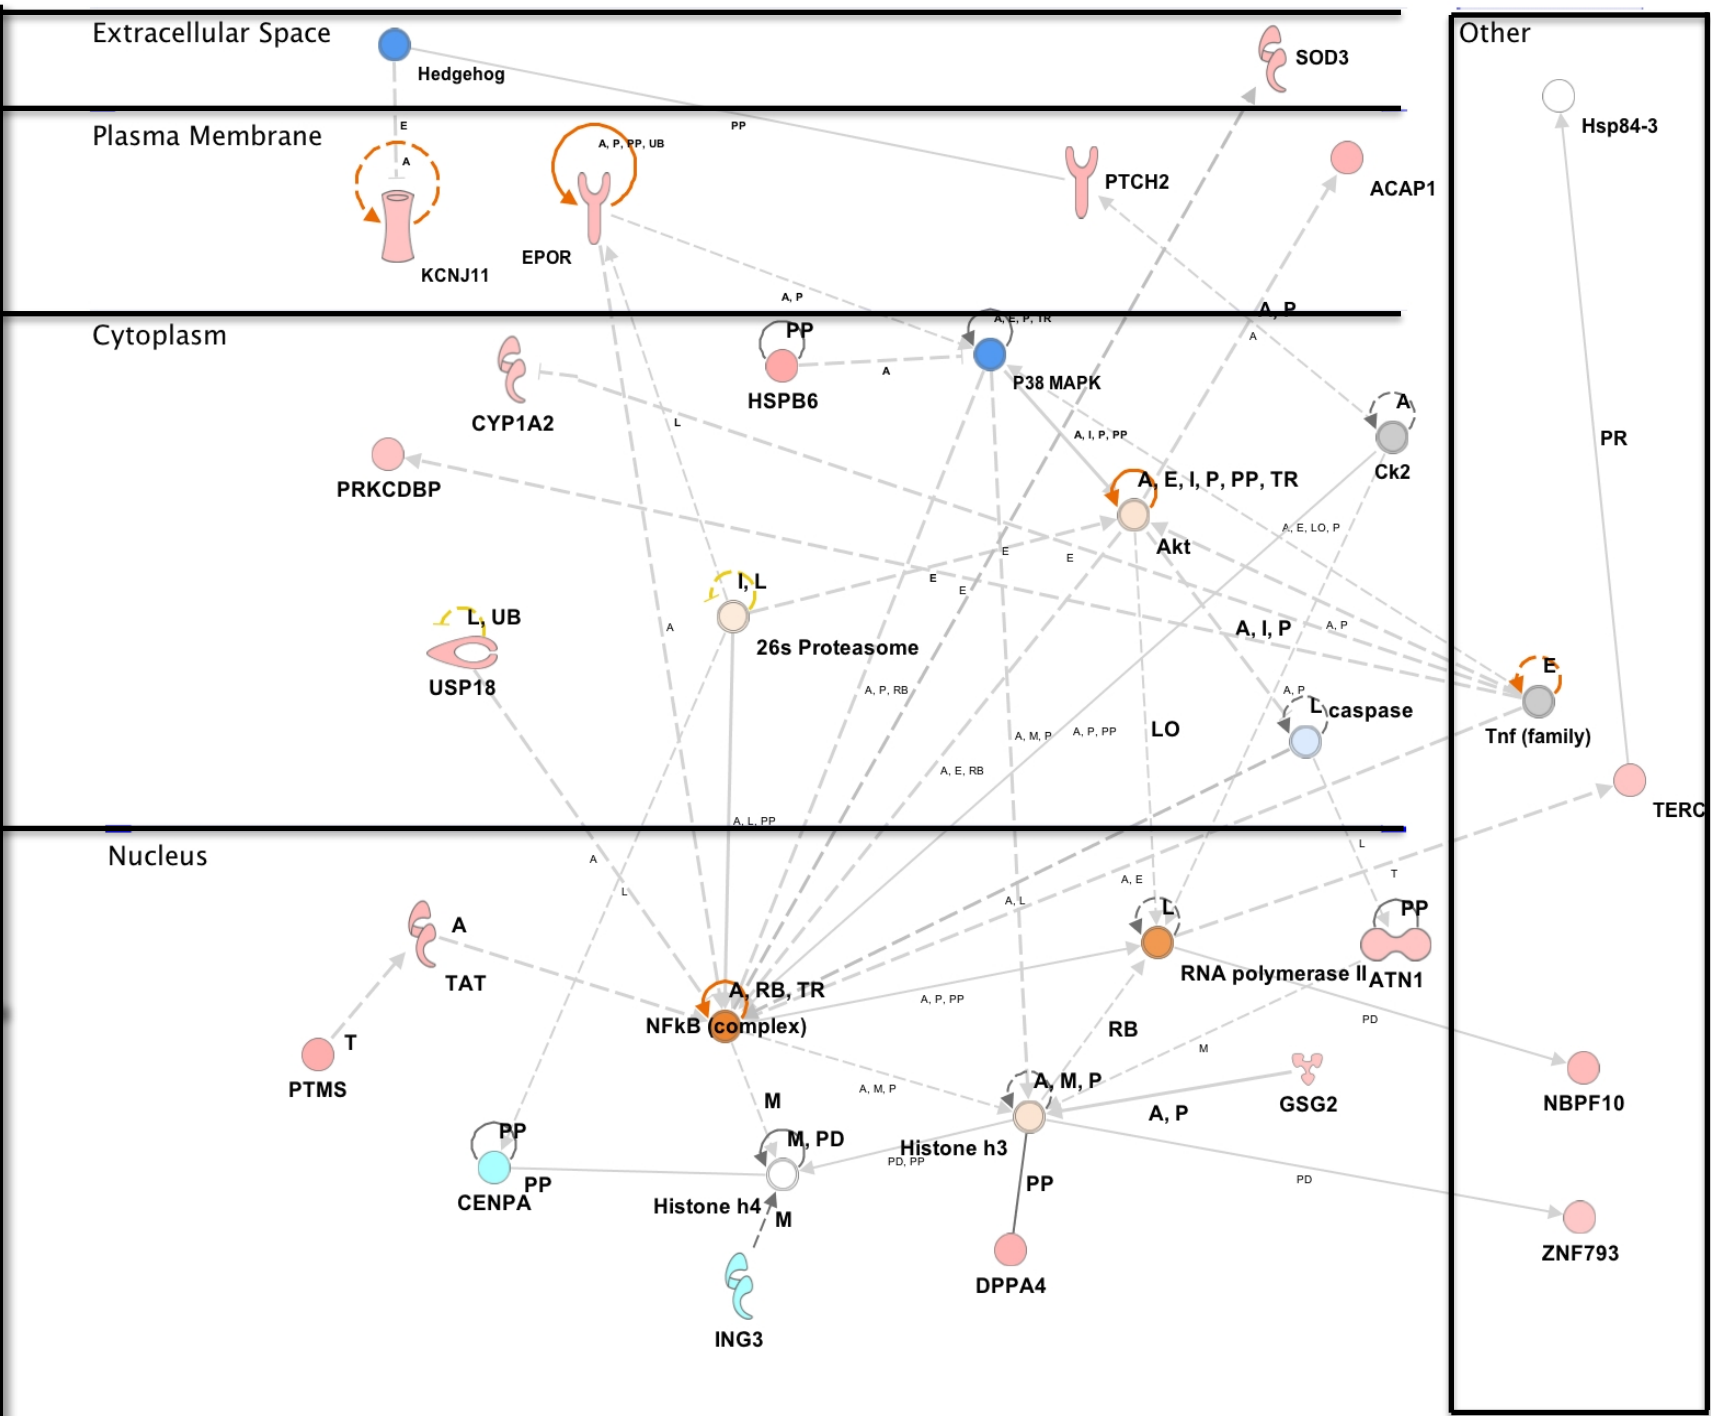

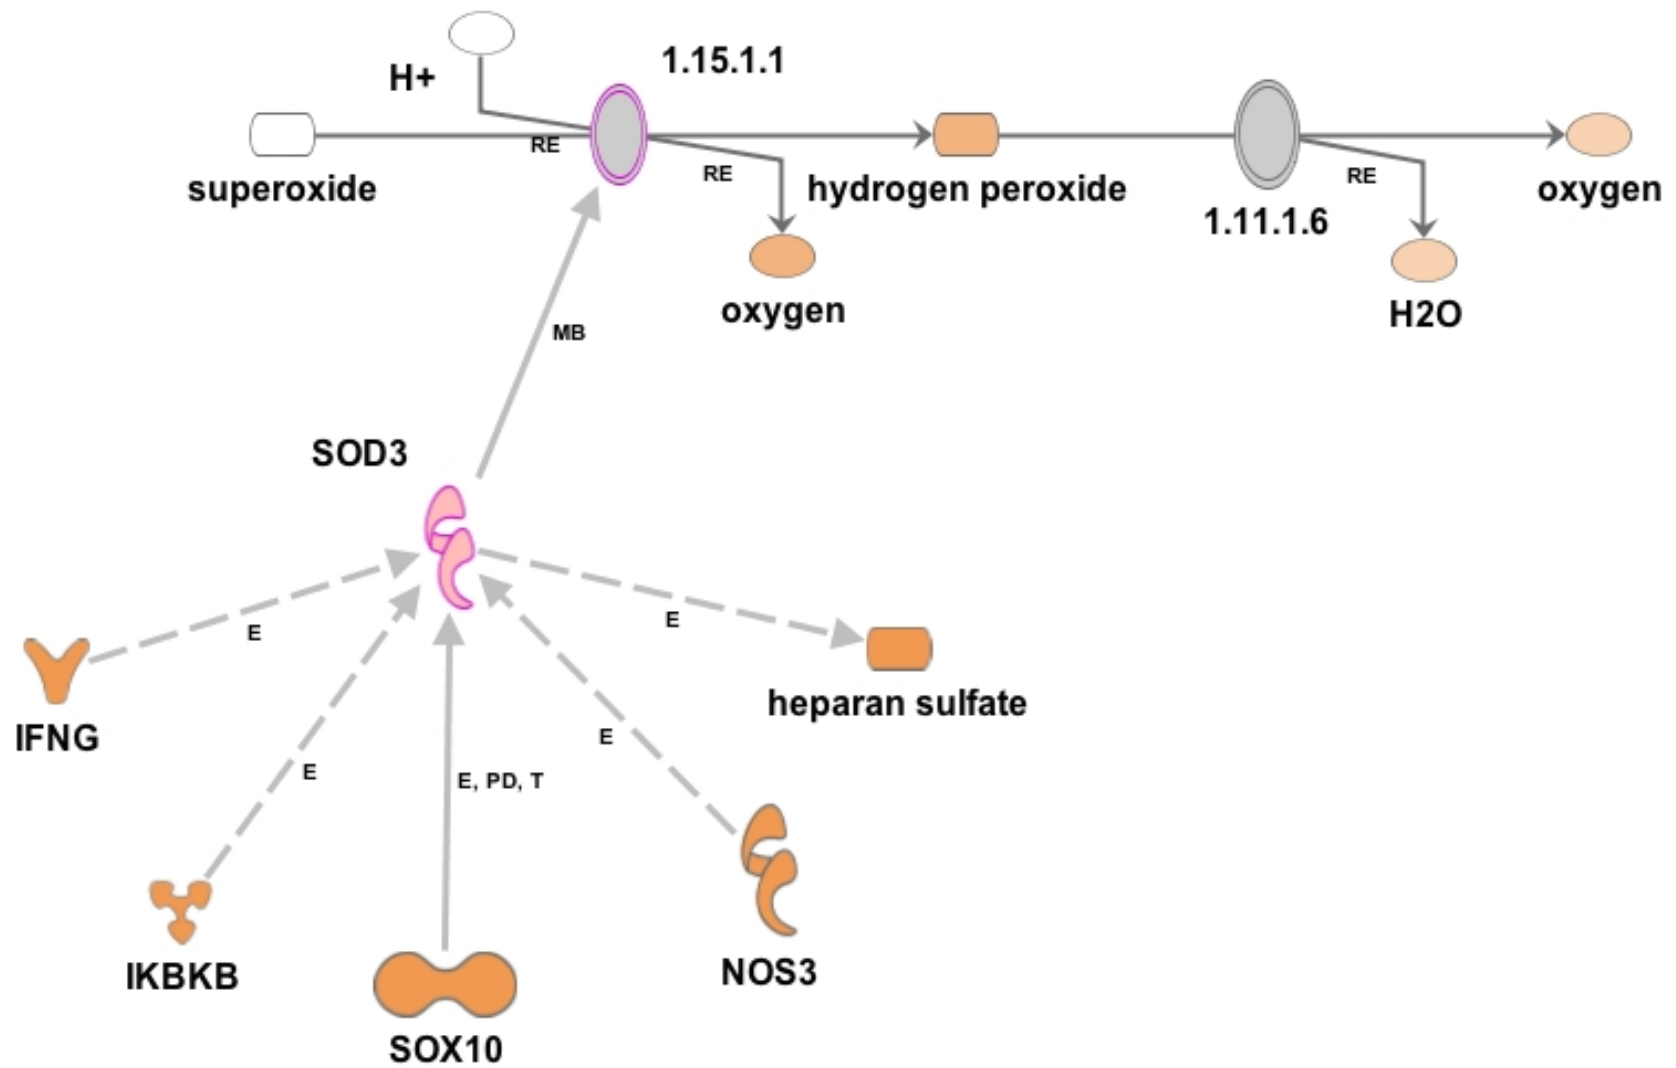

**Path Designer Shapes**

- Complex/Group/Other
- Chemical/Toxicant
- Cytokine/Growth Factor
- Disease
- Drug
- Enzyme
- Function
- G-protein Coupled Receptor
- Ion Channel
- Kinase
- Ligand-dependent Nuclear Receptor
- Mature microRNA
- microRNA
- Peptidase
- Phosphatase
- Transcription Regulator
- Translation Regulator
- Transmembrane Receptor
- Transporter

**Prediction Legend**

|                      |      |
|----------------------|------|
| more extreme         | less |
| Upregulated          |      |
| Downregulated        |      |
| more confidence      | less |
| Predicted activation |      |
| Predicted inhibition |      |

**Predicted Relationships**

- Leads to activation
- Leads to inhibition
- Findings inconsistent with state of downstream molecule
- Effect not predicted

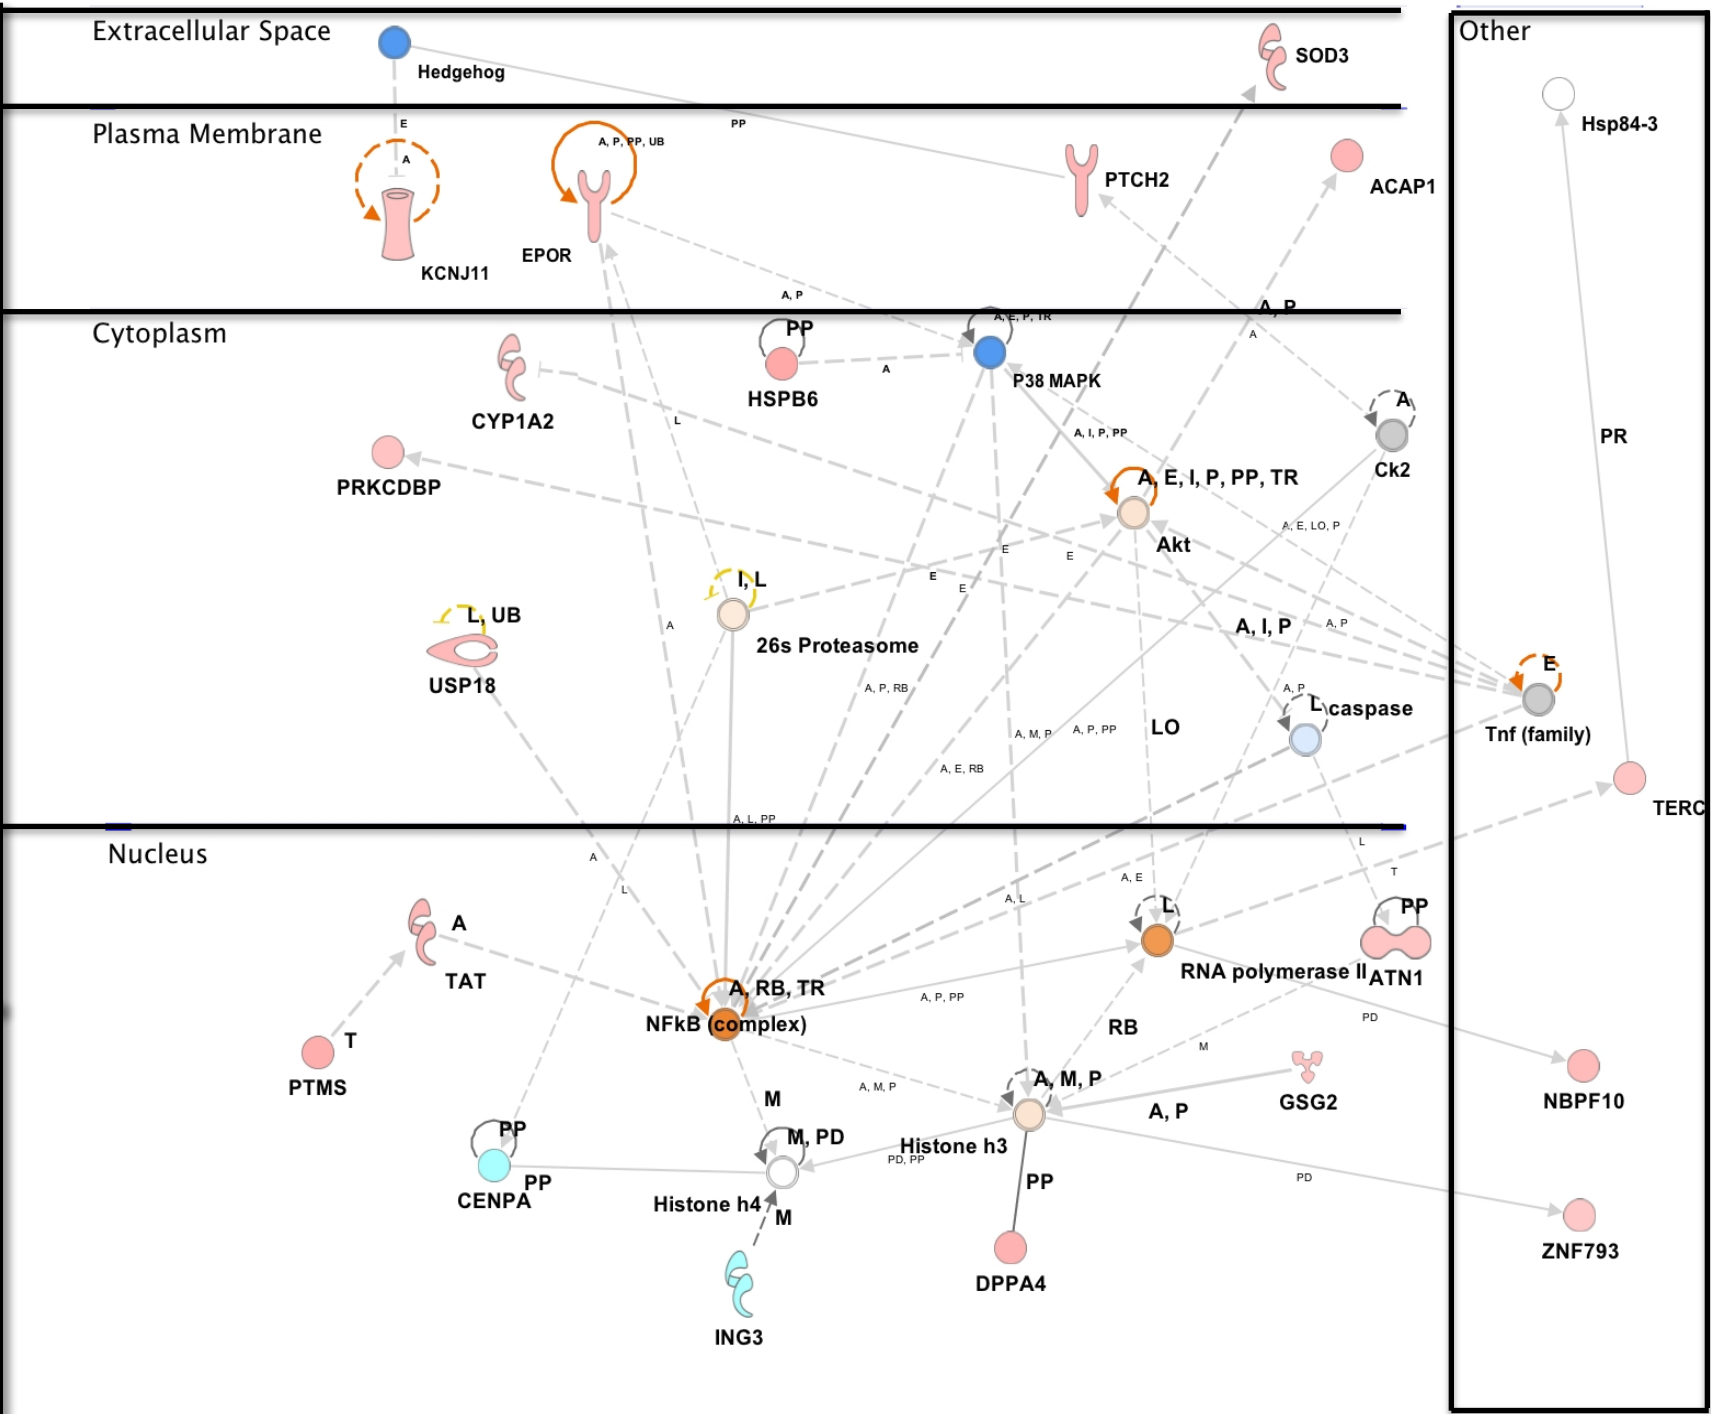



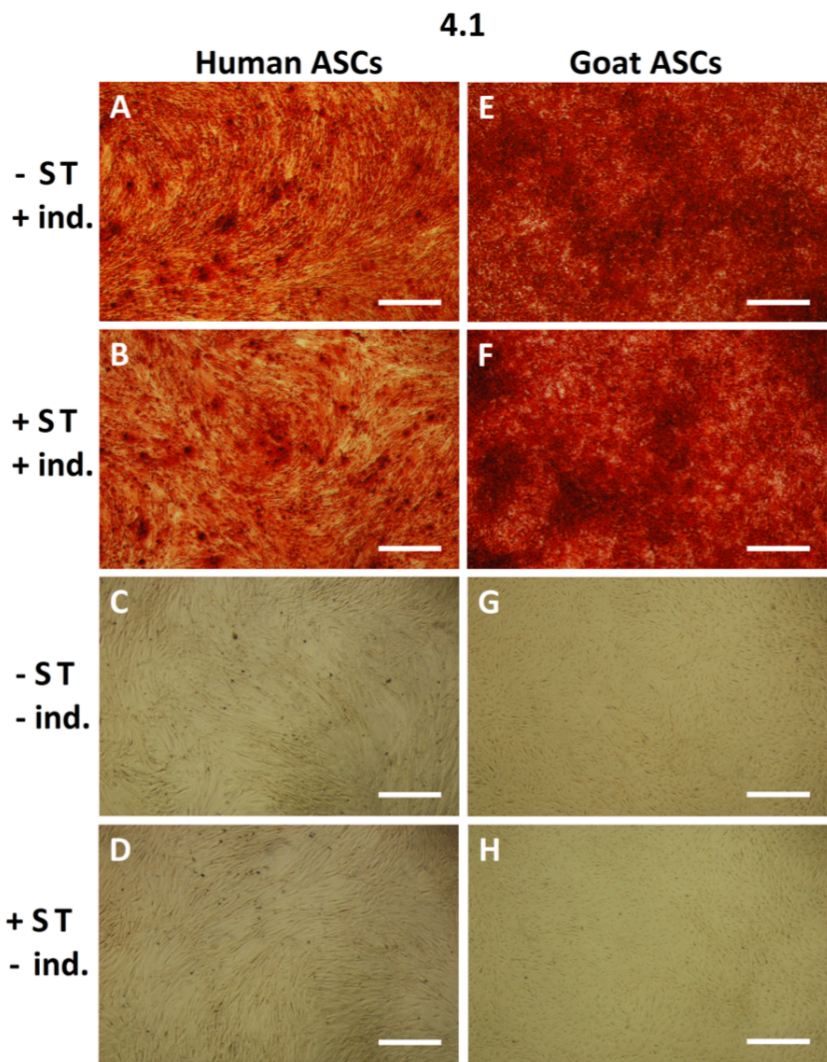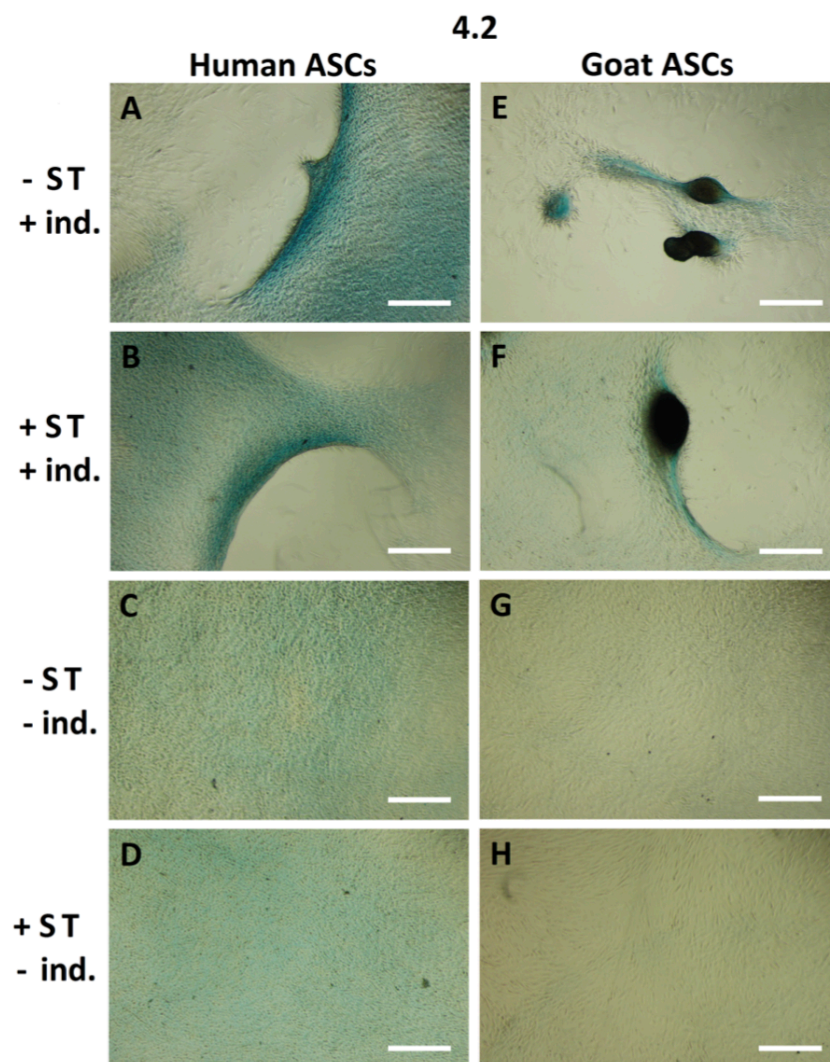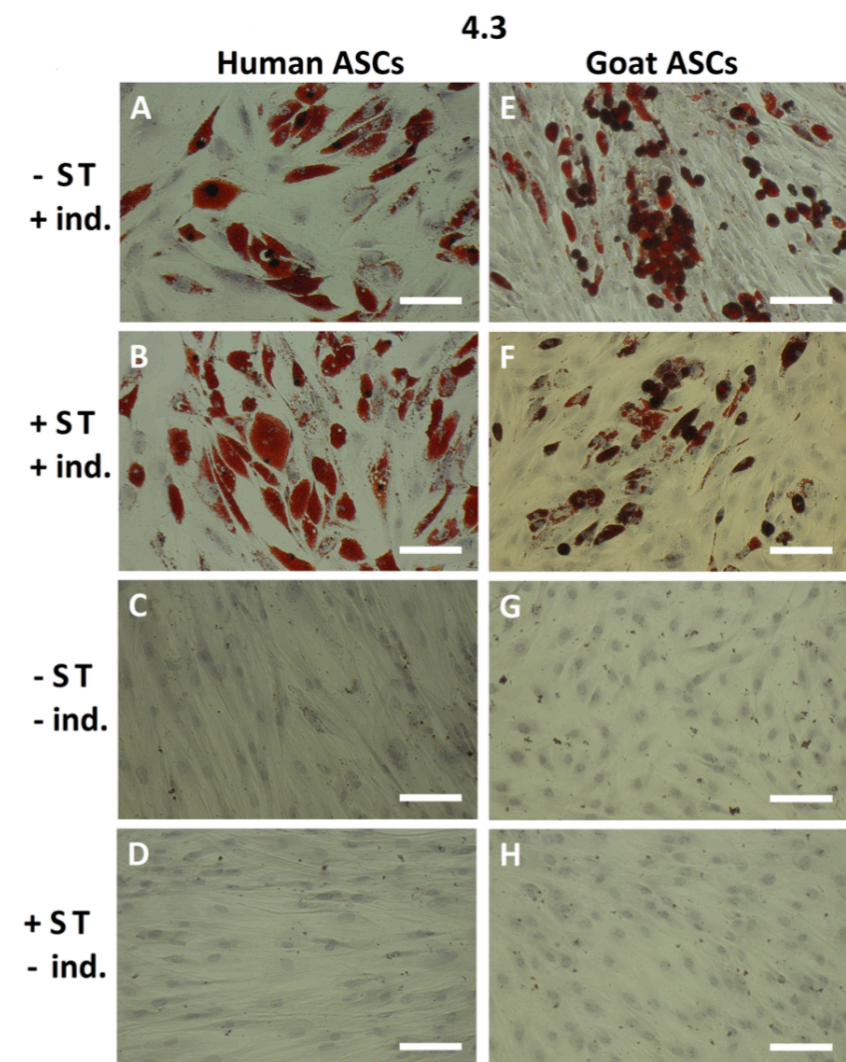

5.1

**A**

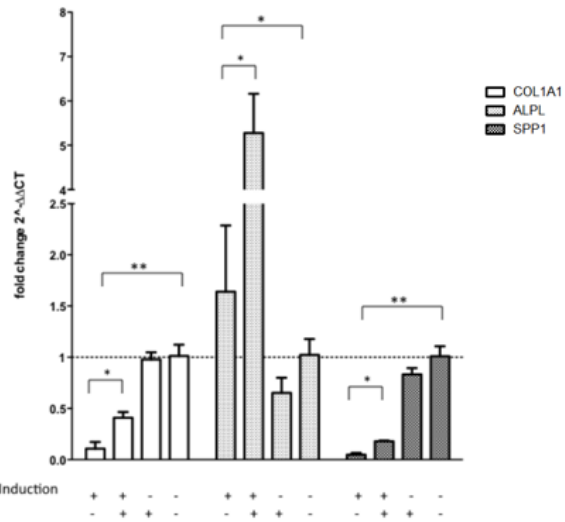

**B**

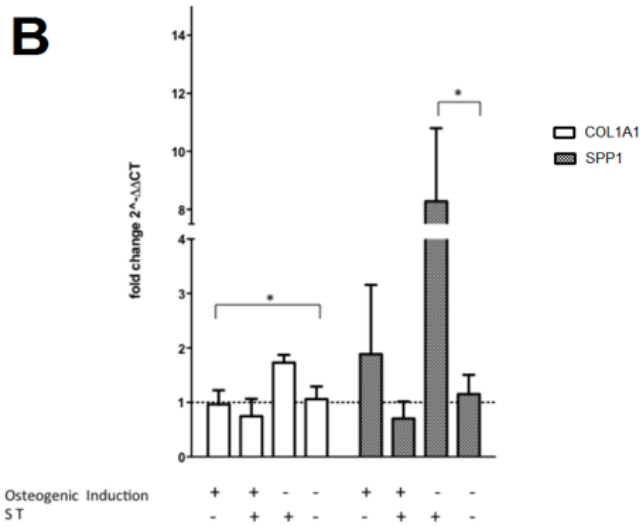

5.2

**A**

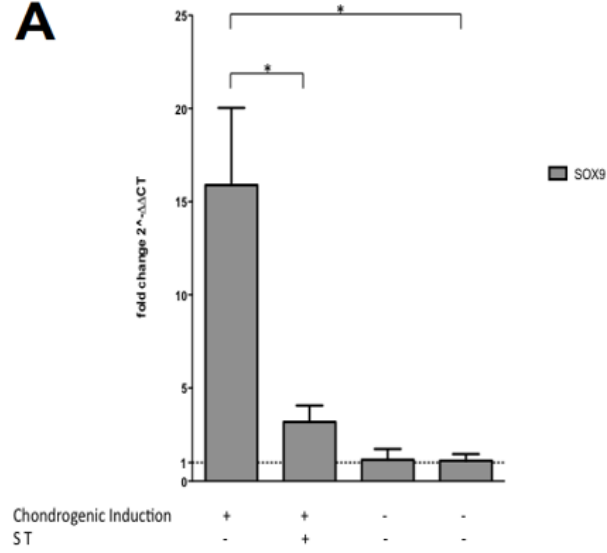

**B**

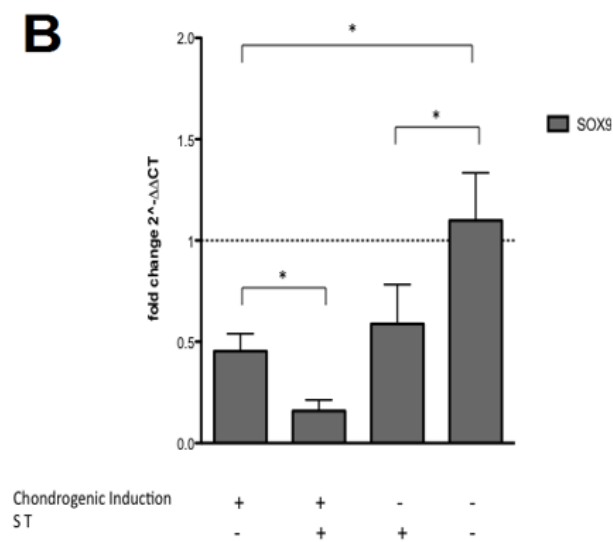

5.3

**A**

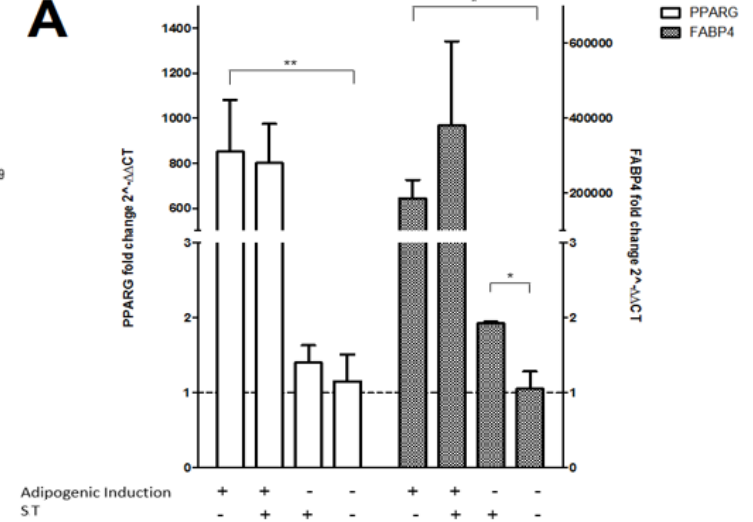

**B**

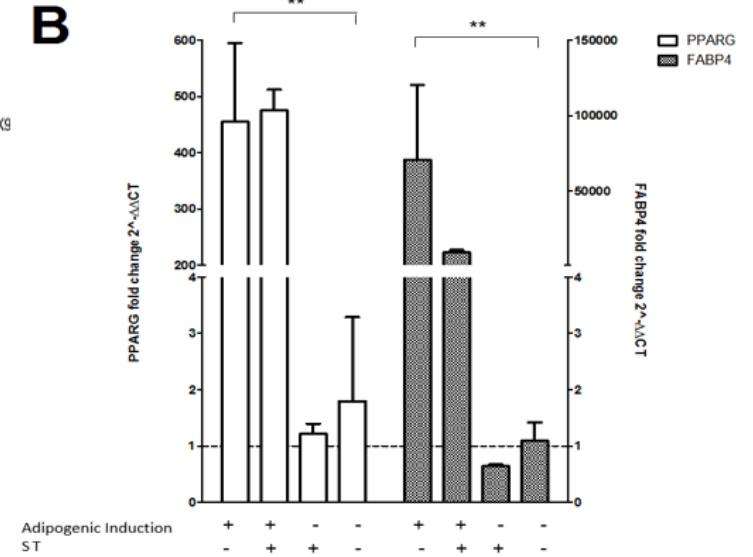

# 6.1

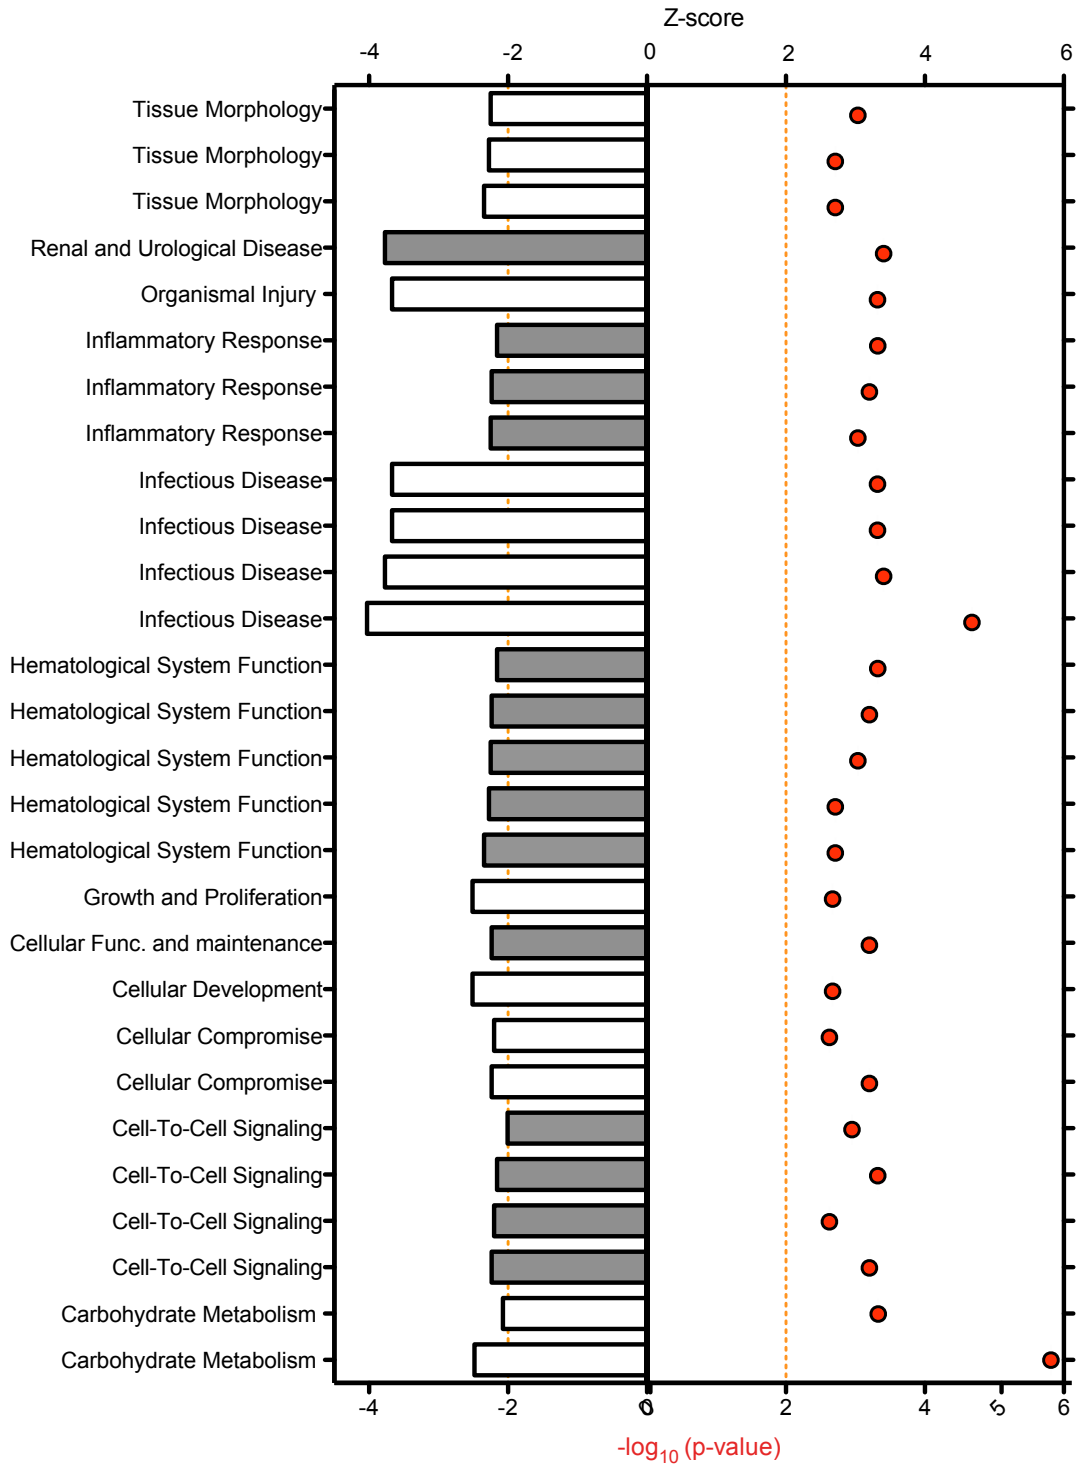

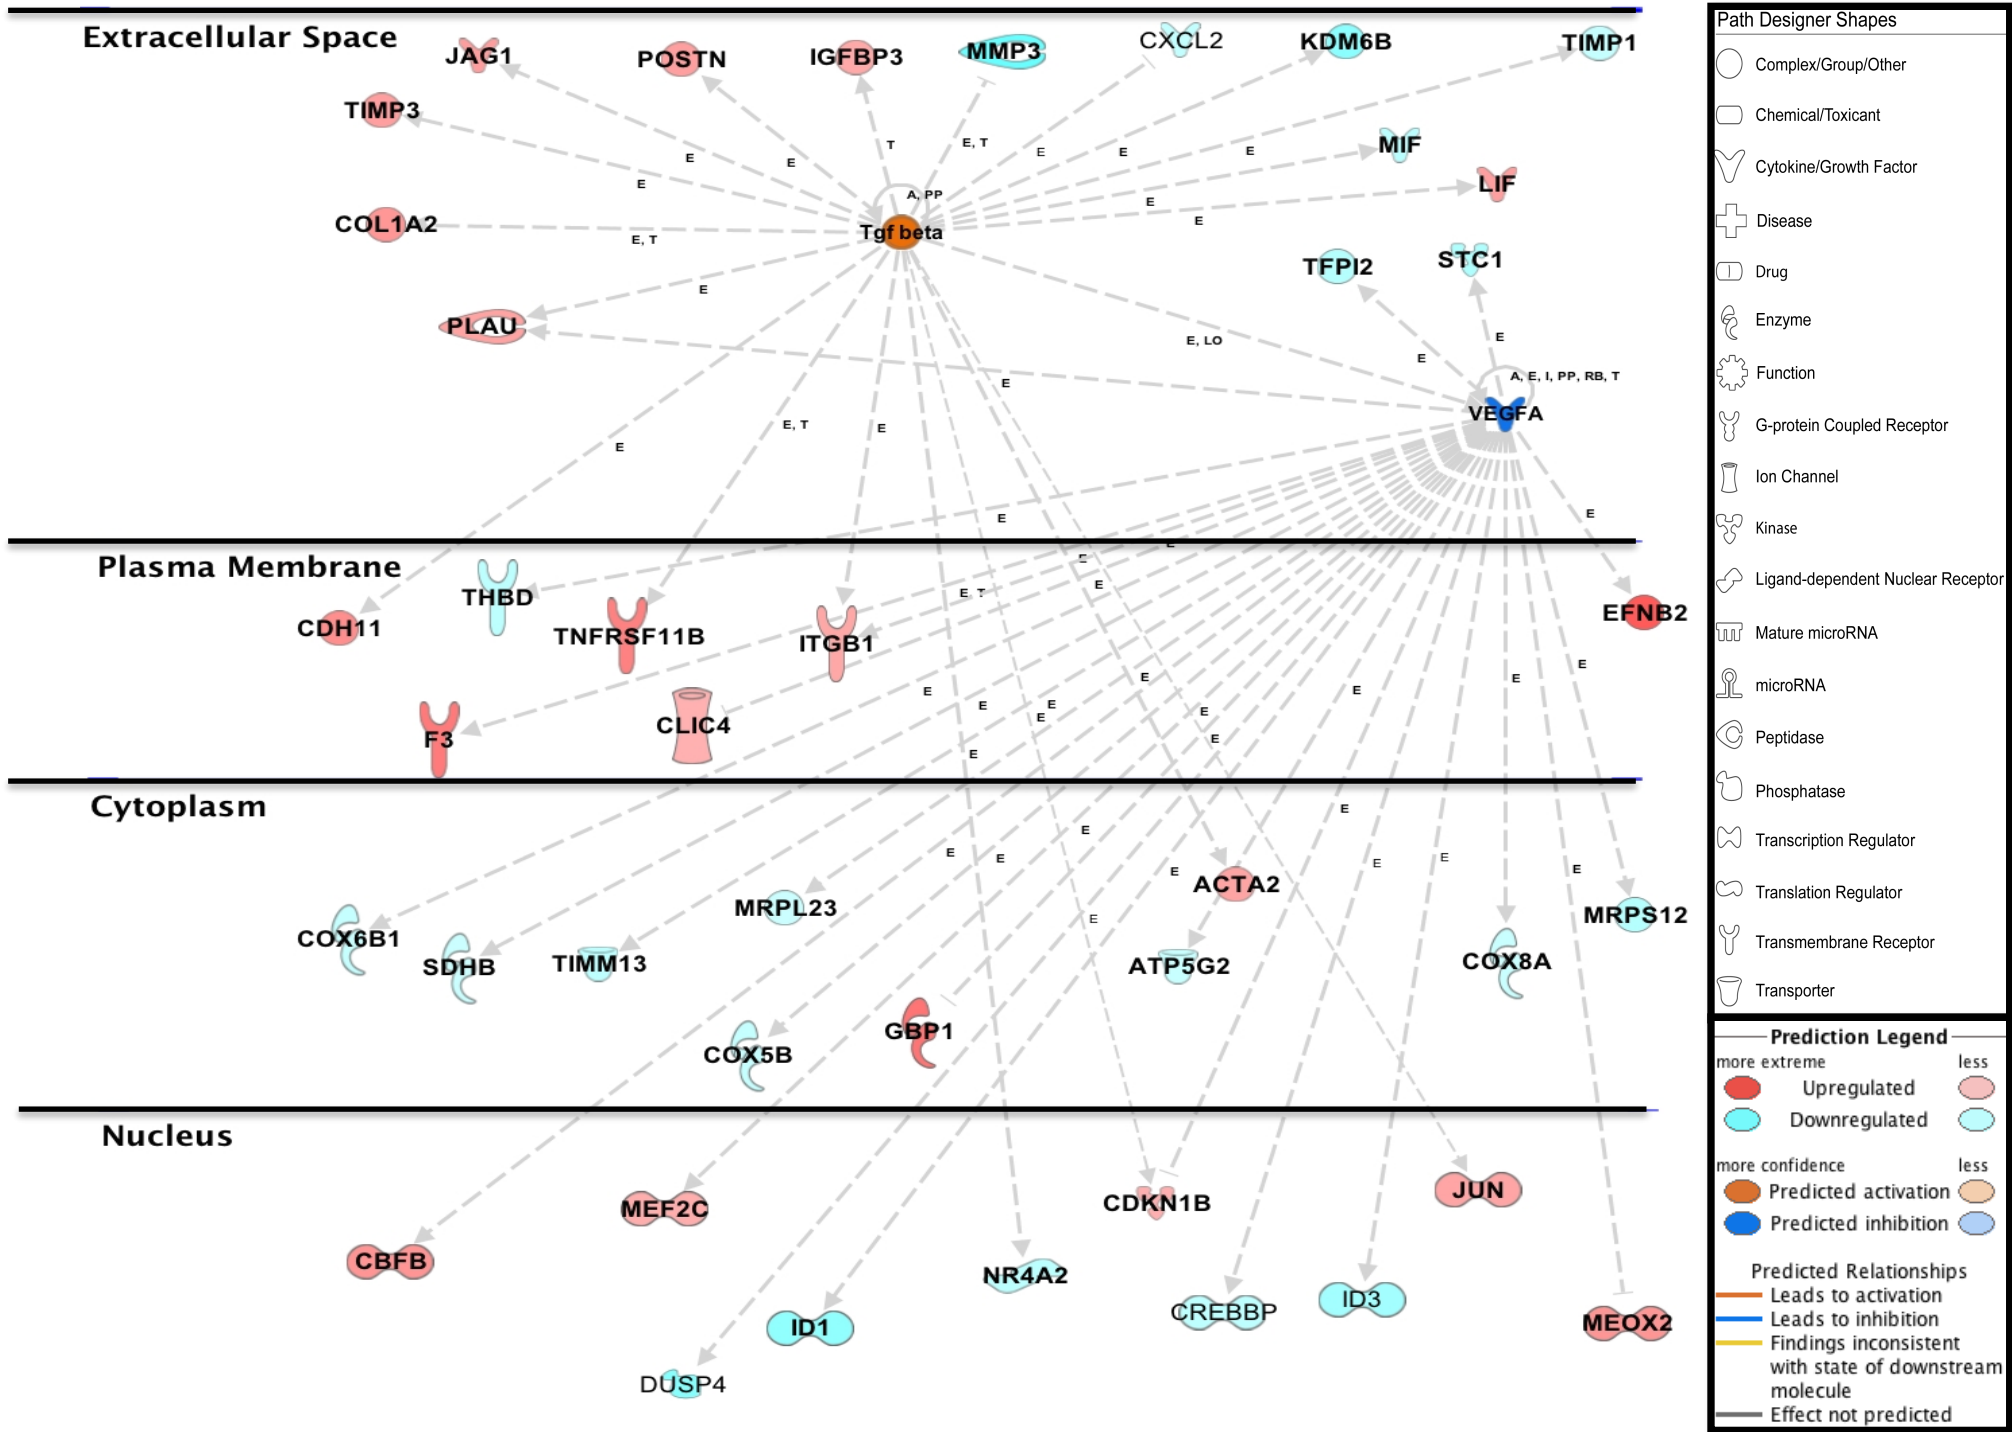

Source: https://www.biorxiv.org/content/biorxiv/early/2019/10/09/795617.full.pdf
